# Supplementary material for: Large-scale investigation of the reasons why potentially important genes are ignored
Source: PLoS Biol. 2018 Sep 18;16(9):e2006643. doi: 10.1371/journal.pbio.2006643 (PMC6143198; doi:10.1371/journal.pbio.2006643)
Supplement: S10 Table — List of genes that have strong loss-of-function sensitivity and GWAS associations, experimental approachability, and the presence of invertebrate model organisms for genes in 15-dimensional feature space. GWAS, genome-wide association study. (XLSX) [file pbio.2006643.s025.xlsx]

## Sheet: Sheet1
gene_ncbi	symbol_ncbi	gene_ensembl	strong_genetic_evidence	experimentally_well_accessible	invertebrate_model_organism
1	A1BG	ENSG00000121410	FALSE	TRUE	FALSE
2	A2M	ENSG00000175899	FALSE	TRUE	FALSE
9	NAT1	ENSG00000171428	FALSE	TRUE	FALSE
10	NAT2	ENSG00000156006	FALSE	TRUE	FALSE
12	SERPINA3	ENSG00000196136	FALSE	TRUE	FALSE
13	AADAC	ENSG00000114771	FALSE	FALSE	TRUE
14	AAMP	ENSG00000127837	FALSE	TRUE	TRUE
15	AANAT	ENSG00000129673	FALSE	FALSE	FALSE
16	AARS	ENSG00000090861	FALSE	TRUE	TRUE
18	ABAT	ENSG00000183044	FALSE	TRUE	TRUE
19	ABCA1	ENSG00000165029	TRUE	TRUE	TRUE
20	ABCA2	ENSG00000107331	TRUE	TRUE	FALSE
21	ABCA3	ENSG00000167972	FALSE	TRUE	TRUE
22	ABCB7	ENSG00000131269	TRUE	TRUE	TRUE
23	ABCF1	ENSG00000204574	FALSE	TRUE	TRUE
24	ABCA4	ENSG00000198691	FALSE	FALSE	FALSE
25	ABL1	ENSG00000097007	TRUE	TRUE	FALSE
26	AOC1	ENSG00000002726	FALSE	TRUE	FALSE
27	ABL2	ENSG00000143322	FALSE	TRUE	FALSE
28	ABO	ENSG00000175164	FALSE	FALSE	FALSE
29	ABR	ENSG00000159842	TRUE	TRUE	TRUE
30	ACAA1	ENSG00000060971	FALSE	TRUE	FALSE
31	ACACA	ENSG00000278540	FALSE	TRUE	TRUE
32	ACACB	ENSG00000076555	FALSE	TRUE	FALSE
33	ACADL	ENSG00000115361	FALSE	TRUE	FALSE
34	ACADM	ENSG00000117054	FALSE	TRUE	TRUE
35	ACADS	ENSG00000122971	FALSE	TRUE	TRUE
36	ACADSB	ENSG00000196177	FALSE	TRUE	TRUE
37	ACADVL	ENSG00000072778	FALSE	TRUE	TRUE
38	ACAT1	ENSG00000075239	FALSE	TRUE	TRUE
39	ACAT2	ENSG00000120437	FALSE	TRUE	TRUE
40	ASIC2	ENSG00000108684	TRUE	TRUE	FALSE
41	ASIC1	ENSG00000110881	TRUE	TRUE	TRUE
43	ACHE	ENSG00000087085	TRUE	TRUE	TRUE
47	ACLY	ENSG00000131473	TRUE	TRUE	TRUE
48	ACO1	ENSG00000122729	FALSE	TRUE	TRUE
49	ACR	ENSG00000100312	FALSE	TRUE	FALSE
50	ACO2	ENSG00000100412	FALSE	TRUE	TRUE
51	ACOX1	ENSG00000161533	FALSE	TRUE	TRUE
52	ACP1	ENSG00000143727	FALSE	TRUE	TRUE
53	ACP2	ENSG00000134575	FALSE	TRUE	TRUE
54	ACP5	ENSG00000102575	FALSE	TRUE	TRUE
55	ACPP	ENSG00000014257	FALSE	TRUE	TRUE
56	ACRV1	ENSG00000134940	FALSE	TRUE	FALSE
58	ACTA1	ENSG00000143632	FALSE	TRUE	FALSE
59	ACTA2	ENSG00000107796	FALSE	TRUE	FALSE
60	ACTB	ENSG00000075624	TRUE	TRUE	TRUE
70	ACTC1	ENSG00000159251	TRUE	TRUE	FALSE
71	ACTG1	ENSG00000184009	FALSE	TRUE	TRUE
72	ACTG2	ENSG00000163017	FALSE	TRUE	TRUE
81	ACTN4	ENSG00000130402	TRUE	TRUE	TRUE
86	ACTL6A	ENSG00000136518	TRUE	TRUE	TRUE
87	ACTN1	ENSG00000072110	TRUE	TRUE	FALSE
88	ACTN2	ENSG00000077522	TRUE	TRUE	FALSE
89	ACTN3	ENSG00000248746	FALSE	TRUE	FALSE
90	ACVR1	ENSG00000115170	TRUE	TRUE	TRUE
91	ACVR1B	ENSG00000135503	TRUE	TRUE	FALSE
92	ACVR2A	ENSG00000121989	TRUE	TRUE	TRUE
93	ACVR2B	ENSG00000114739	TRUE	TRUE	FALSE
94	ACVRL1	ENSG00000139567	FALSE	TRUE	FALSE
95	ACY1	ENSG00000243989	FALSE	TRUE	TRUE
97	ACYP1	ENSG00000119640	FALSE	TRUE	FALSE
98	ACYP2	ENSG00000170634	FALSE	TRUE	TRUE
100	ADA	ENSG00000196839	FALSE	TRUE	TRUE
101	ADAM8	ENSG00000151651	FALSE	TRUE	FALSE
102	ADAM10	ENSG00000137845	TRUE	TRUE	FALSE
103	ADAR	ENSG00000160710	TRUE	TRUE	FALSE
104	ADARB1	ENSG00000197381	FALSE	TRUE	TRUE
105	ADARB2	ENSG00000185736	FALSE	FALSE	FALSE
107	ADCY1	ENSG00000164742	TRUE	TRUE	TRUE
108	ADCY2	ENSG00000078295	TRUE	TRUE	TRUE
109	ADCY3	ENSG00000138031	FALSE	TRUE	TRUE
111	ADCY5	ENSG00000173175	TRUE	TRUE	TRUE
112	ADCY6	ENSG00000174233	FALSE	TRUE	FALSE
113	ADCY7	ENSG00000121281	FALSE	TRUE	FALSE
114	ADCY8	ENSG00000155897	FALSE	FALSE	TRUE
115	ADCY9	ENSG00000162104	TRUE	TRUE	TRUE
116	ADCYAP1	ENSG00000141433	FALSE	TRUE	FALSE
117	ADCYAP1R1	ENSG00000078549	FALSE	TRUE	FALSE
118	ADD1	ENSG00000087274	FALSE	TRUE	TRUE
119	ADD2	ENSG00000075340	TRUE	TRUE	FALSE
120	ADD3	ENSG00000148700	TRUE	TRUE	FALSE
123	PLIN2	ENSG00000147872	FALSE	TRUE	FALSE
124	ADH1A	ENSG00000187758	FALSE	FALSE	FALSE
125	ADH1B	ENSG00000196616	FALSE	TRUE	FALSE
126	ADH1C	ENSG00000248144	FALSE	FALSE	FALSE
127	ADH4	ENSG00000198099	FALSE	FALSE	FALSE
128	ADH5	ENSG00000197894	FALSE	TRUE	TRUE
130	ADH6	ENSG00000172955	FALSE	FALSE	FALSE
131	ADH7	ENSG00000196344	FALSE	FALSE	FALSE
132	ADK	ENSG00000156110	FALSE	TRUE	TRUE
133	ADM	ENSG00000148926	FALSE	TRUE	FALSE
134	ADORA1	ENSG00000163485	FALSE	TRUE	FALSE
135	ADORA2A	ENSG00000128271	FALSE	TRUE	FALSE
136	ADORA2B	ENSG00000170425	FALSE	TRUE	FALSE
140	ADORA3	ENSG00000282608	FALSE	FALSE	FALSE
141	ADPRH	ENSG00000144843	FALSE	TRUE	FALSE
142	PARP1	ENSG00000143799	FALSE	TRUE	TRUE
143	PARP4	ENSG00000102699	FALSE	TRUE	FALSE
146	ADRA1D	ENSG00000171873	FALSE	FALSE	FALSE
147	ADRA1B	ENSG00000170214	FALSE	TRUE	FALSE
148	ADRA1A	ENSG00000120907	FALSE	FALSE	TRUE
150	ADRA2A	ENSG00000150594	FALSE	TRUE	TRUE
151	ADRA2B	ENSG00000274286	FALSE	FALSE	TRUE
152	ADRA2C	ENSG00000184160	FALSE	FALSE	FALSE
153	ADRB1	ENSG00000043591	FALSE	TRUE	TRUE
154	ADRB2	ENSG00000169252	FALSE	TRUE	TRUE
155	ADRB3	ENSG00000188778	FALSE	TRUE	FALSE
156	GRK2	ENSG00000173020	TRUE	TRUE	FALSE
157	GRK3	ENSG00000100077	FALSE	TRUE	TRUE
158	ADSL	ENSG00000239900	FALSE	TRUE	TRUE
159	ADSS	ENSG00000035687	FALSE	TRUE	FALSE
160	AP2A1	ENSG00000196961	TRUE	TRUE	FALSE
161	AP2A2	ENSG00000183020	TRUE	TRUE	TRUE
162	AP1B1	ENSG00000100280	TRUE	TRUE	TRUE
163	AP2B1	ENSG00000006125	FALSE	TRUE	FALSE
164	AP1G1	ENSG00000166747	TRUE	TRUE	TRUE
165	AEBP1	ENSG00000106624	FALSE	TRUE	FALSE
166	AES	ENSG00000104964	FALSE	TRUE	FALSE
167	CRISP1	ENSG00000124812	FALSE	TRUE	FALSE
173	AFM	ENSG00000079557	FALSE	TRUE	FALSE
174	AFP	ENSG00000081051	FALSE	TRUE	FALSE
175	AGA	ENSG00000038002	FALSE	TRUE	TRUE
176	ACAN	ENSG00000157766	TRUE	TRUE	FALSE
177	AGER	ENSG00000204305	FALSE	TRUE	FALSE
178	AGL	ENSG00000162688	FALSE	TRUE	TRUE
181	AGRP	ENSG00000159723	FALSE	TRUE	FALSE
182	JAG1	ENSG00000101384	TRUE	TRUE	TRUE
183	AGT	ENSG00000135744	FALSE	TRUE	FALSE
185	AGTR1	ENSG00000144891	FALSE	TRUE	FALSE
186	AGTR2	ENSG00000180772	FALSE	TRUE	FALSE
187	APLNR	ENSG00000134817	FALSE	TRUE	FALSE
189	AGXT	ENSG00000172482	FALSE	FALSE	TRUE
190	NR0B1	ENSG00000169297	FALSE	TRUE	FALSE
191	AHCY	ENSG00000101444	TRUE	TRUE	TRUE
196	AHR	ENSG00000106546	TRUE	TRUE	FALSE
197	AHSG	ENSG00000145192	FALSE	TRUE	FALSE
199	AIF1	ENSG00000204472	FALSE	TRUE	FALSE
202	AIM1	ENSG00000112297	FALSE	TRUE	FALSE
203	AK1	ENSG00000106992	FALSE	TRUE	TRUE
204	AK2	ENSG00000004455	FALSE	TRUE	TRUE
205	AK4	ENSG00000162433	FALSE	TRUE	FALSE
207	AKT1	ENSG00000142208	FALSE	TRUE	TRUE
208	AKT2	ENSG00000105221	TRUE	TRUE	TRUE
210	ALAD	ENSG00000148218	FALSE	TRUE	TRUE
211	ALAS1	ENSG00000023330	FALSE	TRUE	FALSE
212	ALAS2	ENSG00000158578	TRUE	TRUE	TRUE
213	ALB	ENSG00000163631	TRUE	TRUE	FALSE
214	ALCAM	ENSG00000170017	TRUE	TRUE	FALSE
215	ABCD1	ENSG00000101986	TRUE	TRUE	FALSE
216	ALDH1A1	ENSG00000165092	TRUE	TRUE	FALSE
217	ALDH2	ENSG00000111275	FALSE	TRUE	TRUE
218	ALDH3A1	ENSG00000108602	FALSE	TRUE	FALSE
219	ALDH1B1	ENSG00000137124	FALSE	TRUE	TRUE
220	ALDH1A3	ENSG00000184254	TRUE	TRUE	FALSE
221	ALDH3B1	ENSG00000006534	FALSE	TRUE	TRUE
222	ALDH3B2	ENSG00000132746	FALSE	FALSE	FALSE
223	ALDH9A1	ENSG00000143149	FALSE	TRUE	TRUE
224	ALDH3A2	ENSG00000072210	FALSE	TRUE	TRUE
225	ABCD2	ENSG00000173208	FALSE	FALSE	TRUE
226	ALDOA	ENSG00000149925	FALSE	TRUE	TRUE
229	ALDOB	ENSG00000136872	FALSE	TRUE	FALSE
230	ALDOC	ENSG00000109107	FALSE	TRUE	TRUE
231	AKR1B1	ENSG00000085662	FALSE	TRUE	FALSE
238	ALK	ENSG00000171094	FALSE	TRUE	FALSE
239	ALOX12	ENSG00000108839	FALSE	TRUE	FALSE
240	ALOX5	ENSG00000012779	FALSE	TRUE	FALSE
241	ALOX5AP	ENSG00000132965	FALSE	TRUE	FALSE
242	ALOX12B	ENSG00000179477	FALSE	FALSE	FALSE
246	ALOX15	ENSG00000161905	FALSE	TRUE	FALSE
247	ALOX15B	ENSG00000179593	FALSE	FALSE	FALSE
248	ALPI	ENSG00000163295	FALSE	TRUE	TRUE
249	ALPL	ENSG00000162551	FALSE	TRUE	TRUE
250	ALPP	ENSG00000163283	FALSE	TRUE	TRUE
251	ALPPL2	ENSG00000163286	FALSE	TRUE	TRUE
257	ALX3	ENSG00000156150	FALSE	TRUE	FALSE
258	AMBN	ENSG00000178522	FALSE	TRUE	FALSE
259	AMBP	ENSG00000106927	FALSE	TRUE	FALSE
262	AMD1	ENSG00000123505	TRUE	TRUE	TRUE
265	AMELX	ENSG00000125363	FALSE	TRUE	FALSE
266	AMELY	ENSG00000099721	FALSE	TRUE	FALSE
267	AMFR	ENSG00000159461	FALSE	TRUE	TRUE
268	AMH	ENSG00000104899	FALSE	TRUE	FALSE
269	AMHR2	ENSG00000135409	FALSE	TRUE	FALSE
270	AMPD1	ENSG00000116748	FALSE	FALSE	FALSE
271	AMPD2	ENSG00000116337	FALSE	TRUE	TRUE
272	AMPD3	ENSG00000133805	FALSE	TRUE	FALSE
273	AMPH	ENSG00000078053	FALSE	TRUE	TRUE
274	BIN1	ENSG00000136717	FALSE	TRUE	FALSE
275	AMT	ENSG00000145020	FALSE	TRUE	TRUE
276	AMY1A	ENSG00000237763	FALSE	TRUE	FALSE
277	AMY1B	ENSG00000174876	FALSE	FALSE	FALSE
278	AMY1C	ENSG00000187733	FALSE	FALSE	FALSE
279	AMY2A	ENSG00000243480	FALSE	TRUE	FALSE
280	AMY2B	ENSG00000240038	FALSE	TRUE	TRUE
283	ANG	ENSG00000214274	FALSE	TRUE	FALSE
284	ANGPT1	ENSG00000154188	TRUE	TRUE	FALSE
285	ANGPT2	ENSG00000091879	FALSE	TRUE	FALSE
286	ANK1	ENSG00000029534	TRUE	TRUE	FALSE
287	ANK2	ENSG00000145362	TRUE	TRUE	FALSE
288	ANK3	ENSG00000151150	TRUE	TRUE	TRUE
290	ANPEP	ENSG00000166825	FALSE	TRUE	TRUE
291	SLC25A4	ENSG00000151729	FALSE	TRUE	TRUE
292	SLC25A5	ENSG00000005022	FALSE	TRUE	FALSE
293	SLC25A6	ENSG00000169100	FALSE	TRUE	TRUE
301	ANXA1	ENSG00000135046	FALSE	TRUE	FALSE
302	ANXA2	ENSG00000182718	FALSE	TRUE	FALSE
306	ANXA3	ENSG00000138772	FALSE	TRUE	FALSE
307	ANXA4	ENSG00000196975	FALSE	TRUE	FALSE
308	ANXA5	ENSG00000164111	FALSE	TRUE	FALSE
309	ANXA6	ENSG00000197043	FALSE	TRUE	TRUE
310	ANXA7	ENSG00000138279	FALSE	TRUE	TRUE
311	ANXA11	ENSG00000122359	FALSE	TRUE	TRUE
312	ANXA13	ENSG00000104537	FALSE	TRUE	TRUE
313	AOAH	ENSG00000136250	FALSE	TRUE	FALSE
314	AOC2	ENSG00000131480	FALSE	TRUE	FALSE
316	AOX1	ENSG00000138356	FALSE	TRUE	FALSE
317	APAF1	ENSG00000120868	FALSE	TRUE	FALSE
318	NUDT2	ENSG00000164978	FALSE	TRUE	TRUE
319	APOF	ENSG00000175336	FALSE	TRUE	FALSE
320	APBA1	ENSG00000107282	FALSE	TRUE	FALSE
321	APBA2	ENSG00000034053	FALSE	TRUE	FALSE
322	APBB1	ENSG00000166313	TRUE	TRUE	FALSE
323	APBB2	ENSG00000163697	FALSE	TRUE	FALSE
324	APC	ENSG00000134982	FALSE	TRUE	FALSE
325	APCS	ENSG00000132703	FALSE	TRUE	FALSE
326	AIRE	ENSG00000160224	FALSE	TRUE	FALSE
327	APEH	ENSG00000164062	FALSE	TRUE	TRUE
328	APEX1	ENSG00000100823	FALSE	TRUE	FALSE
329	BIRC2	ENSG00000110330	FALSE	TRUE	TRUE
330	BIRC3	ENSG00000023445	FALSE	TRUE	FALSE
331	XIAP	ENSG00000101966	TRUE	TRUE	FALSE
332	BIRC5	ENSG00000089685	FALSE	TRUE	FALSE
333	APLP1	ENSG00000105290	FALSE	TRUE	FALSE
334	APLP2	ENSG00000084234	FALSE	TRUE	FALSE
335	APOA1	ENSG00000118137	FALSE	TRUE	FALSE
336	APOA2	ENSG00000158874	FALSE	TRUE	FALSE
337	APOA4	ENSG00000110244	FALSE	TRUE	FALSE
338	APOB	ENSG00000084674	TRUE	TRUE	FALSE
339	APOBEC1	ENSG00000111701	FALSE	TRUE	FALSE
341	APOC1	ENSG00000130208	FALSE	TRUE	FALSE
343	AQP8	ENSG00000103375	FALSE	FALSE	TRUE
344	APOC2	ENSG00000224916	FALSE	TRUE	FALSE
345	APOC3	ENSG00000110245	FALSE	TRUE	FALSE
346	APOC4	ENSG00000224916	FALSE	TRUE	FALSE
347	APOD	ENSG00000189058	FALSE	TRUE	TRUE
348	APOE	ENSG00000130203	FALSE	TRUE	FALSE
350	APOH	ENSG00000091583	FALSE	TRUE	FALSE
351	APP	ENSG00000142192	FALSE	TRUE	TRUE
353	APRT	ENSG00000198931	FALSE	TRUE	TRUE
354	KLK3	ENSG00000142515	FALSE	TRUE	FALSE
355	FAS	ENSG00000026103	FALSE	TRUE	FALSE
356	FASLG	ENSG00000117560	FALSE	TRUE	FALSE
357	SHROOM2	ENSG00000146950	FALSE	TRUE	FALSE
358	AQP1	ENSG00000240583	FALSE	TRUE	TRUE
359	AQP2	ENSG00000167580	FALSE	FALSE	FALSE
360	AQP3	ENSG00000165272	FALSE	TRUE	TRUE
361	AQP4	ENSG00000171885	FALSE	TRUE	TRUE
362	AQP5	ENSG00000161798	FALSE	FALSE	FALSE
363	AQP6	ENSG00000086159	FALSE	FALSE	FALSE
364	AQP7	ENSG00000165269	FALSE	TRUE	FALSE
366	AQP9	ENSG00000103569	FALSE	FALSE	FALSE
367	AR	ENSG00000169083	TRUE	TRUE	FALSE
368	ABCC6	ENSG00000091262	FALSE	TRUE	FALSE
369	ARAF	ENSG00000078061	FALSE	TRUE	FALSE
372	ARCN1	ENSG00000095139	TRUE	TRUE	TRUE
373	TRIM23	ENSG00000113595	FALSE	TRUE	TRUE
374	AREG	ENSG00000109321	FALSE	TRUE	FALSE
375	ARF1	ENSG00000143761	FALSE	TRUE	TRUE
377	ARF3	ENSG00000134287	FALSE	TRUE	FALSE
378	ARF4	ENSG00000168374	TRUE	TRUE	TRUE
379	ARL4D	ENSG00000175906	FALSE	TRUE	FALSE
381	ARF5	ENSG00000004059	FALSE	TRUE	TRUE
382	ARF6	ENSG00000165527	FALSE	TRUE	TRUE
383	ARG1	ENSG00000118520	FALSE	TRUE	TRUE
384	ARG2	ENSG00000081181	FALSE	TRUE	TRUE
387	RHOA	ENSG00000067560	FALSE	TRUE	TRUE
388	RHOB	ENSG00000143878	FALSE	TRUE	FALSE
389	RHOC	ENSG00000155366	FALSE	TRUE	TRUE
390	RND3	ENSG00000115963	TRUE	TRUE	FALSE
391	RHOG	ENSG00000177105	FALSE	TRUE	FALSE
392	ARHGAP1	ENSG00000175220	FALSE	TRUE	TRUE
393	ARHGAP4	ENSG00000089820	TRUE	TRUE	FALSE
394	ARHGAP5	ENSG00000100852	TRUE	TRUE	FALSE
395	ARHGAP6	ENSG00000047648	TRUE	TRUE	FALSE
396	ARHGDIA	ENSG00000141522	FALSE	TRUE	TRUE
397	ARHGDIB	ENSG00000111348	FALSE	TRUE	FALSE
398	ARHGDIG	ENSG00000242173	FALSE	TRUE	FALSE
399	RHOH	ENSG00000168421	FALSE	TRUE	FALSE
400	ARL1	ENSG00000120805	FALSE	TRUE	TRUE
401	PHOX2A	ENSG00000165462	FALSE	TRUE	FALSE
402	ARL2	ENSG00000213465	FALSE	TRUE	TRUE
403	ARL3	ENSG00000138175	FALSE	TRUE	TRUE
405	ARNT	ENSG00000143437	TRUE	TRUE	FALSE
406	ARNTL	ENSG00000133794	TRUE	TRUE	TRUE
407	ARR3	ENSG00000120500	FALSE	FALSE	FALSE
408	ARRB1	ENSG00000137486	TRUE	TRUE	TRUE
409	ARRB2	ENSG00000141480	FALSE	TRUE	FALSE
410	ARSA	ENSG00000100299	FALSE	TRUE	FALSE
411	ARSB	ENSG00000113273	FALSE	TRUE	TRUE
412	STS	ENSG00000101846	TRUE	TRUE	FALSE
414	ARSD	ENSG00000006756	FALSE	TRUE	FALSE
415	ARSE	ENSG00000157399	FALSE	TRUE	FALSE
416	ARSF	ENSG00000062096	FALSE	TRUE	TRUE
417	ART1	ENSG00000129744	FALSE	TRUE	FALSE
419	ART3	ENSG00000156219	FALSE	TRUE	FALSE
420	ART4	ENSG00000111339	FALSE	FALSE	FALSE
421	ARVCF	ENSG00000099889	FALSE	TRUE	FALSE
427	ASAH1	ENSG00000104763	FALSE	TRUE	TRUE
429	ASCL1	ENSG00000139352	FALSE	TRUE	FALSE
430	ASCL2	ENSG00000183734	FALSE	TRUE	FALSE
432	ASGR1	ENSG00000141505	FALSE	TRUE	FALSE
433	ASGR2	ENSG00000161944	FALSE	FALSE	FALSE
434	ASIP	ENSG00000101440	FALSE	TRUE	FALSE
435	ASL	ENSG00000126522	FALSE	TRUE	TRUE
438	ASMT	ENSG00000196433	FALSE	FALSE	FALSE
439	ASNA1	ENSG00000198356	FALSE	TRUE	TRUE
440	ASNS	ENSG00000070669	FALSE	TRUE	TRUE
443	ASPA	ENSG00000108381	FALSE	TRUE	FALSE
444	ASPH	ENSG00000198363	FALSE	TRUE	FALSE
445	ASS1	ENSG00000130707	FALSE	TRUE	TRUE
460	ASTN1	ENSG00000152092	TRUE	TRUE	FALSE
462	SERPINC1	ENSG00000117601	TRUE	TRUE	FALSE
463	ZFHX3	ENSG00000140836	TRUE	TRUE	FALSE
466	ATF1	ENSG00000123268	FALSE	TRUE	FALSE
467	ATF3	ENSG00000162772	FALSE	TRUE	FALSE
468	ATF4	ENSG00000128272	FALSE	TRUE	FALSE
471	ATIC	ENSG00000138363	FALSE	TRUE	TRUE
472	ATM	ENSG00000149311	FALSE	TRUE	FALSE
473	RERE	ENSG00000142599	TRUE	TRUE	FALSE
474	ATOH1	ENSG00000172238	FALSE	TRUE	FALSE
475	ATOX1	ENSG00000177556	FALSE	TRUE	FALSE
476	ATP1A1	ENSG00000163399	TRUE	TRUE	FALSE
477	ATP1A2	ENSG00000018625	FALSE	TRUE	FALSE
478	ATP1A3	ENSG00000105409	TRUE	TRUE	TRUE
479	ATP12A	ENSG00000075673	FALSE	FALSE	FALSE
480	ATP1A4	ENSG00000132681	FALSE	FALSE	FALSE
481	ATP1B1	ENSG00000143153	FALSE	TRUE	TRUE
482	ATP1B2	ENSG00000129244	FALSE	TRUE	TRUE
483	ATP1B3	ENSG00000069849	FALSE	TRUE	FALSE
486	FXYD2	ENSG00000137731	FALSE	TRUE	FALSE
487	ATP2A1	ENSG00000196296	FALSE	TRUE	TRUE
488	ATP2A2	ENSG00000174437	TRUE	TRUE	FALSE
489	ATP2A3	ENSG00000074370	FALSE	TRUE	FALSE
490	ATP2B1	ENSG00000070961	FALSE	TRUE	FALSE
491	ATP2B2	ENSG00000157087	TRUE	FALSE	TRUE
492	ATP2B3	ENSG00000067842	TRUE	FALSE	TRUE
493	ATP2B4	ENSG00000058668	FALSE	TRUE	TRUE
495	ATP4A	ENSG00000105675	FALSE	TRUE	FALSE
496	ATP4B	ENSG00000186009	FALSE	FALSE	FALSE
498	ATP5A1	ENSG00000152234	TRUE	TRUE	TRUE
501	ALDH7A1	ENSG00000164904	FALSE	TRUE	TRUE
506	ATP5B	ENSG00000110955	TRUE	TRUE	TRUE
509	ATP5C1	ENSG00000165629	FALSE	TRUE	TRUE
513	ATP5D	ENSG00000099624	FALSE	TRUE	TRUE
514	ATP5E	ENSG00000124172	FALSE	TRUE	FALSE
515	ATP5F1	ENSG00000116459	FALSE	TRUE	TRUE
516	ATP5G1	ENSG00000159199	FALSE	TRUE	FALSE
517	ATP5G2	ENSG00000135390	FALSE	TRUE	TRUE
518	ATP5G3	ENSG00000154518	FALSE	TRUE	FALSE
521	ATP5I	ENSG00000169020	FALSE	TRUE	FALSE
522	ATP5J	ENSG00000154723	FALSE	TRUE	FALSE
523	ATP6V1A	ENSG00000114573	TRUE	TRUE	TRUE
525	ATP6V1B1	ENSG00000116039	FALSE	FALSE	TRUE
526	ATP6V1B2	ENSG00000147416	TRUE	TRUE	TRUE
527	ATP6V0C	ENSG00000185883	FALSE	TRUE	TRUE
528	ATP6V1C1	ENSG00000155097	FALSE	TRUE	TRUE
529	ATP6V1E1	ENSG00000131100	FALSE	TRUE	TRUE
533	ATP6V0B	ENSG00000117410	TRUE	TRUE	TRUE
534	ATP6V1G2	ENSG00000213760	FALSE	TRUE	TRUE
535	ATP6V0A1	ENSG00000033627	TRUE	FALSE	TRUE
537	ATP6AP1	ENSG00000071553	FALSE	TRUE	FALSE
538	ATP7A	ENSG00000165240	TRUE	TRUE	TRUE
539	ATP5O	ENSG00000241837	FALSE	TRUE	TRUE
540	ATP7B	ENSG00000123191	FALSE	TRUE	FALSE
545	ATR	ENSG00000175054	FALSE	TRUE	FALSE
546	ATRX	ENSG00000085224	TRUE	TRUE	FALSE
547	KIF1A	ENSG00000130294	TRUE	FALSE	TRUE
549	AUH	ENSG00000148090	FALSE	TRUE	TRUE
550	AUP1	ENSG00000115307	FALSE	TRUE	TRUE
551	AVP	ENSG00000101200	FALSE	TRUE	FALSE
552	AVPR1A	ENSG00000166148	FALSE	TRUE	TRUE
553	AVPR1B	ENSG00000198049	FALSE	TRUE	FALSE
554	AVPR2	ENSG00000126895	FALSE	TRUE	FALSE
558	AXL	ENSG00000167601	FALSE	TRUE	FALSE
563	AZGP1	ENSG00000160862	FALSE	TRUE	FALSE
566	AZU1	ENSG00000172232	FALSE	TRUE	FALSE
567	B2M	ENSG00000166710	FALSE	TRUE	FALSE
570	BAAT	ENSG00000136881	FALSE	FALSE	FALSE
571	BACH1	ENSG00000156273	FALSE	TRUE	FALSE
572	BAD	ENSG00000002330	FALSE	TRUE	FALSE
573	BAG1	ENSG00000107262	FALSE	TRUE	FALSE
574	BAGE		FALSE	TRUE	FALSE
575	ADGRB1	ENSG00000181790	TRUE	TRUE	FALSE
576	ADGRB2	ENSG00000121753	TRUE	TRUE	FALSE
577	ADGRB3	ENSG00000135298	TRUE	FALSE	FALSE
578	BAK1	ENSG00000030110	FALSE	TRUE	FALSE
579	NKX3-2	ENSG00000109705	FALSE	FALSE	FALSE
580	BARD1	ENSG00000138376	FALSE	TRUE	FALSE
581	BAX	ENSG00000087088	FALSE	TRUE	FALSE
582	BBS1	ENSG00000174483	FALSE	FALSE	TRUE
583	BBS2	ENSG00000125124	FALSE	TRUE	TRUE
585	BBS4	ENSG00000140463	FALSE	TRUE	TRUE
586	BCAT1	ENSG00000060982	FALSE	TRUE	TRUE
587	BCAT2	ENSG00000105552	FALSE	TRUE	TRUE
590	BCHE	ENSG00000114200	FALSE	TRUE	FALSE
593	BCKDHA	ENSG00000248098	FALSE	TRUE	TRUE
594	BCKDHB	ENSG00000083123	FALSE	TRUE	TRUE
595	CCND1	ENSG00000110092	FALSE	TRUE	FALSE
596	BCL2	ENSG00000171791	FALSE	TRUE	FALSE
597	BCL2A1	ENSG00000140379	FALSE	TRUE	FALSE
598	BCL2L1	ENSG00000171552	FALSE	TRUE	FALSE
599	BCL2L2	ENSG00000129473	FALSE	TRUE	FALSE
602	BCL3	ENSG00000069399	FALSE	TRUE	FALSE
604	BCL6	ENSG00000113916	TRUE	TRUE	FALSE
605	BCL7A	ENSG00000110987	FALSE	TRUE	FALSE
607	BCL9	ENSG00000116128	FALSE	TRUE	FALSE
608	TNFRSF17	ENSG00000048462	FALSE	TRUE	FALSE
610	HCN2	ENSG00000099822	FALSE	TRUE	FALSE
611	OPN1SW	ENSG00000128617	FALSE	FALSE	FALSE
613	BCR	ENSG00000186716	TRUE	TRUE	FALSE
617	BCS1L	ENSG00000074582	FALSE	TRUE	TRUE
622	BDH1	ENSG00000161267	FALSE	TRUE	FALSE
623	BDKRB1	ENSG00000100739	FALSE	TRUE	FALSE
624	BDKRB2	ENSG00000168398	FALSE	TRUE	FALSE
627	BDNF	ENSG00000176697	TRUE	TRUE	FALSE
629	CFB	ENSG00000243649	TRUE	TRUE	FALSE
631	BFSP1	ENSG00000125864	FALSE	TRUE	FALSE
632	BGLAP	ENSG00000242252	FALSE	TRUE	FALSE
633	BGN	ENSG00000182492	TRUE	TRUE	FALSE
634	CEACAM1	ENSG00000079385	FALSE	TRUE	FALSE
635	BHMT	ENSG00000145692	FALSE	FALSE	FALSE
636	BICD1	ENSG00000151746	FALSE	TRUE	FALSE
637	BID	ENSG00000015475	FALSE	TRUE	FALSE
638	BIK	ENSG00000100290	FALSE	TRUE	FALSE
639	PRDM1	ENSG00000057657	TRUE	TRUE	FALSE
640	BLK	ENSG00000136573	FALSE	TRUE	FALSE
641	BLM	ENSG00000197299	FALSE	TRUE	FALSE
642	BLMH	ENSG00000108578	FALSE	TRUE	TRUE
643	CXCR5	ENSG00000160683	FALSE	TRUE	FALSE
644	BLVRA	ENSG00000106605	FALSE	TRUE	FALSE
645	BLVRB	ENSG00000090013	FALSE	TRUE	TRUE
646	BNC1	ENSG00000169594	FALSE	TRUE	FALSE
648	BMI1	ENSG00000168283	FALSE	TRUE	FALSE
649	BMP1	ENSG00000168487	FALSE	TRUE	FALSE
650	BMP2	ENSG00000125845	TRUE	TRUE	TRUE
651	BMP3	ENSG00000152785	FALSE	TRUE	FALSE
652	BMP4	ENSG00000125378	TRUE	TRUE	FALSE
653	BMP5	ENSG00000112175	FALSE	FALSE	FALSE
654	BMP6	ENSG00000153162	FALSE	TRUE	FALSE
655	BMP7	ENSG00000101144	TRUE	TRUE	TRUE
656	BMP8B	ENSG00000116985	FALSE	TRUE	FALSE
657	BMPR1A	ENSG00000107779	FALSE	TRUE	FALSE
658	BMPR1B	ENSG00000138696	TRUE	TRUE	TRUE
659	BMPR2	ENSG00000204217	TRUE	TRUE	FALSE
660	BMX	ENSG00000102010	FALSE	TRUE	FALSE
661	POLR3D	ENSG00000168495	FALSE	TRUE	FALSE
662	BNIP1	ENSG00000113734	FALSE	TRUE	TRUE
663	BNIP2	ENSG00000140299	FALSE	TRUE	FALSE
664	BNIP3	ENSG00000176171	FALSE	TRUE	FALSE
665	BNIP3L	ENSG00000104765	FALSE	TRUE	FALSE
666	BOK	ENSG00000176720	FALSE	TRUE	TRUE
667	DST	ENSG00000151914	TRUE	TRUE	TRUE
668	FOXL2	ENSG00000183770	FALSE	TRUE	FALSE
669	BPGM	ENSG00000172331	FALSE	TRUE	FALSE
670	BPHL	ENSG00000137274	FALSE	TRUE	TRUE
671	BPI	ENSG00000101425	FALSE	TRUE	FALSE
672	BRCA1	ENSG00000012048	FALSE	TRUE	FALSE
673	BRAF	ENSG00000157764	TRUE	TRUE	TRUE
675	BRCA2	ENSG00000139618	FALSE	TRUE	FALSE
676	BRDT	ENSG00000137948	FALSE	FALSE	FALSE
677	ZFP36L1	ENSG00000185650	FALSE	TRUE	FALSE
678	ZFP36L2	ENSG00000152518	FALSE	TRUE	FALSE
680	BRS3	ENSG00000102239	FALSE	FALSE	TRUE
682	BSG	ENSG00000172270	FALSE	TRUE	FALSE
683	BST1	ENSG00000109743	TRUE	TRUE	FALSE
684	BST2	ENSG00000130303	FALSE	TRUE	FALSE
685	BTC	ENSG00000174808	FALSE	TRUE	FALSE
686	BTD	ENSG00000169814	FALSE	TRUE	TRUE
687	KLF9	ENSG00000119138	FALSE	TRUE	FALSE
688	KLF5	ENSG00000102554	FALSE	TRUE	FALSE
689	BTF3	ENSG00000145741	TRUE	TRUE	TRUE
694	BTG1	ENSG00000133639	FALSE	TRUE	FALSE
695	BTK	ENSG00000010671	TRUE	TRUE	FALSE
696	BTN1A1	ENSG00000124557	FALSE	TRUE	FALSE
699	BUB1	ENSG00000169679	FALSE	TRUE	FALSE
701	BUB1B	ENSG00000156970	FALSE	TRUE	FALSE
705	BYSL	ENSG00000112578	FALSE	TRUE	TRUE
706	TSPO	ENSG00000100300	FALSE	TRUE	TRUE
708	C1QBP	ENSG00000108561	FALSE	TRUE	TRUE
710	SERPING1	ENSG00000149131	TRUE	TRUE	FALSE
712	C1QA	ENSG00000173372	FALSE	TRUE	FALSE
713	C1QB	ENSG00000173369	FALSE	TRUE	FALSE
714	C1QC	ENSG00000159189	FALSE	TRUE	FALSE
715	C1R	ENSG00000159403	FALSE	TRUE	FALSE
716	C1S	ENSG00000182326	FALSE	TRUE	FALSE
717	C2	ENSG00000166278	FALSE	TRUE	FALSE
718	C3	ENSG00000125730	TRUE	TRUE	FALSE
719	C3AR1	ENSG00000171860	FALSE	TRUE	FALSE
720	C4A	ENSG00000244731	FALSE	TRUE	FALSE
721	C4B	ENSG00000224389	FALSE	TRUE	FALSE
722	C4BPA	ENSG00000123838	FALSE	FALSE	FALSE
725	C4BPB	ENSG00000123843	FALSE	TRUE	FALSE
726	CAPN5	ENSG00000149260	FALSE	TRUE	TRUE
727	C5	ENSG00000106804	FALSE	TRUE	FALSE
728	C5AR1	ENSG00000197405	FALSE	TRUE	FALSE
729	C6	ENSG00000039537	FALSE	TRUE	FALSE
730	C7	ENSG00000112936	FALSE	TRUE	FALSE
731	C8A	ENSG00000157131	FALSE	TRUE	FALSE
732	C8B	ENSG00000021852	FALSE	TRUE	FALSE
733	C8G	ENSG00000176919	FALSE	TRUE	FALSE
734	OSGIN2	ENSG00000164823	TRUE	TRUE	TRUE
735	C9	ENSG00000113600	FALSE	TRUE	FALSE
738	VPS51	ENSG00000149823	FALSE	TRUE	TRUE
740	MRPL49	ENSG00000149792	FALSE	TRUE	FALSE
741	ZNHIT2	ENSG00000174276	FALSE	TRUE	TRUE
744	MPPED2	ENSG00000066382	TRUE	TRUE	FALSE
745	MYRF	ENSG00000124920	TRUE	TRUE	FALSE
746	TMEM258	ENSG00000134825	FALSE	FALSE	TRUE
747	DAGLA	ENSG00000134780	TRUE	TRUE	FALSE
752	FMNL1	ENSG00000184922	TRUE	TRUE	FALSE
753	LDLRAD4	ENSG00000168675	FALSE	TRUE	FALSE
754	PTTG1IP	ENSG00000183255	FALSE	TRUE	FALSE
755	C21orf2	ENSG00000160226	FALSE	TRUE	FALSE
757	TMEM50B	ENSG00000142188	FALSE	TRUE	TRUE
758	MPPED1	ENSG00000186732	FALSE	FALSE	TRUE
759	CA1	ENSG00000133742	FALSE	FALSE	FALSE
760	CA2	ENSG00000104267	FALSE	TRUE	FALSE
761	CA3	ENSG00000164879	FALSE	TRUE	FALSE
762	CA4	ENSG00000167434	FALSE	TRUE	FALSE
763	CA5A	ENSG00000174990	FALSE	TRUE	TRUE
765	CA6	ENSG00000131686	FALSE	TRUE	FALSE
766	CA7	ENSG00000168748	FALSE	FALSE	TRUE
767	CA8	ENSG00000178538	FALSE	TRUE	FALSE
768	CA9	ENSG00000107159	FALSE	TRUE	FALSE
770	CA11	ENSG00000063180	TRUE	TRUE	FALSE
771	CA12	ENSG00000074410	FALSE	TRUE	FALSE
773	CACNA1A	ENSG00000141837	TRUE	TRUE	FALSE
774	CACNA1B	ENSG00000148408	TRUE	TRUE	TRUE
775	CACNA1C	ENSG00000151067	TRUE	TRUE	FALSE
776	CACNA1D	ENSG00000157388	TRUE	TRUE	TRUE
777	CACNA1E	ENSG00000198216	TRUE	FALSE	FALSE
778	CACNA1F	ENSG00000102001	FALSE	FALSE	FALSE
779	CACNA1S	ENSG00000081248	FALSE	FALSE	FALSE
780	DDR1	ENSG00000204580	FALSE	TRUE	FALSE
781	CACNA2D1	ENSG00000153956	TRUE	TRUE	FALSE
782	CACNB1	ENSG00000067191	TRUE	TRUE	FALSE
783	CACNB2	ENSG00000165995	FALSE	TRUE	FALSE
784	CACNB3	ENSG00000167535	FALSE	TRUE	FALSE
785	CACNB4	ENSG00000182389	FALSE	FALSE	TRUE
786	CACNG1	ENSG00000108878	FALSE	FALSE	FALSE
788	SLC25A20	ENSG00000178537	FALSE	TRUE	TRUE
790	CAD	ENSG00000084774	TRUE	TRUE	TRUE
793	CALB1	ENSG00000104327	FALSE	TRUE	FALSE
794	CALB2	ENSG00000172137	FALSE	TRUE	FALSE
795	S100G	ENSG00000169906	FALSE	FALSE	FALSE
796	CALCA	ENSG00000110680	FALSE	TRUE	FALSE
797	CALCB	ENSG00000175868	FALSE	TRUE	FALSE
799	CALCR	ENSG00000004948	FALSE	TRUE	FALSE
800	CALD1	ENSG00000122786	TRUE	TRUE	FALSE
801	CALM1	ENSG00000198668	FALSE	TRUE	TRUE
805	CALM2	ENSG00000143933	FALSE	TRUE	TRUE
808	CALM3	ENSG00000160014	FALSE	TRUE	TRUE
810	CALML3	ENSG00000178363	FALSE	TRUE	FALSE
811	CALR	ENSG00000179218	TRUE	TRUE	TRUE
813	CALU	ENSG00000128595	FALSE	TRUE	TRUE
814	CAMK4	ENSG00000152495	FALSE	TRUE	FALSE
815	CAMK2A	ENSG00000070808	TRUE	TRUE	FALSE
816	CAMK2B	ENSG00000058404	FALSE	FALSE	FALSE
817	CAMK2D	ENSG00000145349	FALSE	TRUE	TRUE
818	CAMK2G	ENSG00000148660	TRUE	TRUE	FALSE
819	CAMLG	ENSG00000164615	FALSE	TRUE	FALSE
820	CAMP	ENSG00000164047	FALSE	TRUE	FALSE
821	CANX	ENSG00000127022	FALSE	TRUE	TRUE
822	CAPG	ENSG00000042493	FALSE	TRUE	FALSE
823	CAPN1	ENSG00000014216	FALSE	TRUE	FALSE
824	CAPN2	ENSG00000162909	FALSE	TRUE	FALSE
825	CAPN3	ENSG00000092529	FALSE	TRUE	FALSE
826	CAPNS1	ENSG00000126247	FALSE	TRUE	FALSE
827	CAPN6	ENSG00000077274	TRUE	TRUE	FALSE
828	CAPS	ENSG00000105519	FALSE	TRUE	FALSE
829	CAPZA1	ENSG00000116489	TRUE	TRUE	TRUE
830	CAPZA2	ENSG00000198898	TRUE	TRUE	TRUE
831	CAST	ENSG00000153113	FALSE	TRUE	FALSE
832	CAPZB	ENSG00000077549	FALSE	TRUE	TRUE
833	CARS	ENSG00000110619	FALSE	TRUE	TRUE
834	CASP1	ENSG00000137752	FALSE	TRUE	FALSE
835	CASP2	ENSG00000106144	FALSE	TRUE	FALSE
836	CASP3	ENSG00000164305	FALSE	TRUE	FALSE
837	CASP4	ENSG00000196954	FALSE	TRUE	FALSE
838	CASP5	ENSG00000137757	FALSE	FALSE	FALSE
839	CASP6	ENSG00000138794	FALSE	TRUE	FALSE
840	CASP7	ENSG00000165806	FALSE	TRUE	TRUE
841	CASP8	ENSG00000064012	FALSE	TRUE	FALSE
842	CASP9	ENSG00000132906	FALSE	TRUE	FALSE
843	CASP10	ENSG00000003400	FALSE	TRUE	FALSE
844	CASQ1	ENSG00000143318	FALSE	TRUE	TRUE
845	CASQ2	ENSG00000118729	FALSE	TRUE	FALSE
846	CASR	ENSG00000036828	FALSE	TRUE	FALSE
847	CAT	ENSG00000121691	FALSE	TRUE	TRUE
857	CAV1	ENSG00000105974	FALSE	TRUE	FALSE
858	CAV2	ENSG00000105971	FALSE	TRUE	FALSE
859	CAV3	ENSG00000182533	FALSE	TRUE	FALSE
860	RUNX2	ENSG00000124813	FALSE	TRUE	FALSE
861	RUNX1	ENSG00000159216	FALSE	TRUE	FALSE
862	RUNX1T1	ENSG00000079102	TRUE	TRUE	FALSE
863	CBFA2T3	ENSG00000129993	FALSE	TRUE	TRUE
864	RUNX3	ENSG00000020633	FALSE	TRUE	FALSE
865	CBFB	ENSG00000067955	TRUE	TRUE	TRUE
866	SERPINA6	ENSG00000170099	FALSE	TRUE	FALSE
867	CBL	ENSG00000110395	FALSE	TRUE	FALSE
868	CBLB	ENSG00000114423	TRUE	TRUE	FALSE
869	CBLN1	ENSG00000102924	FALSE	TRUE	FALSE
871	SERPINH1	ENSG00000149257	FALSE	TRUE	FALSE
873	CBR1	ENSG00000159228	FALSE	TRUE	FALSE
874	CBR3	ENSG00000159231	FALSE	TRUE	FALSE
875	CBS	ENSG00000160200	FALSE	TRUE	TRUE
881	CCIN	ENSG00000185972	FALSE	FALSE	FALSE
883	KYAT1	ENSG00000171097	FALSE	TRUE	FALSE
885	CCK	ENSG00000187094	FALSE	TRUE	FALSE
886	CCKAR	ENSG00000163394	FALSE	FALSE	TRUE
887	CCKBR	ENSG00000110148	FALSE	FALSE	TRUE
889	KRIT1	ENSG00000001631	FALSE	TRUE	TRUE
890	CCNA2	ENSG00000145386	TRUE	TRUE	TRUE
891	CCNB1	ENSG00000134057	FALSE	TRUE	TRUE
892	CCNC	ENSG00000112237	TRUE	TRUE	TRUE
894	CCND2	ENSG00000118971	TRUE	TRUE	TRUE
896	CCND3	ENSG00000112576	TRUE	TRUE	FALSE
898	CCNE1	ENSG00000105173	FALSE	TRUE	TRUE
899	CCNF	ENSG00000162063	FALSE	TRUE	FALSE
900	CCNG1	ENSG00000113328	FALSE	TRUE	TRUE
901	CCNG2	ENSG00000138764	FALSE	TRUE	FALSE
902	CCNH	ENSG00000134480	FALSE	TRUE	TRUE
904	CCNT1	ENSG00000129315	TRUE	TRUE	FALSE
905	CCNT2	ENSG00000082258	FALSE	TRUE	FALSE
908	CCT6A	ENSG00000146731	TRUE	TRUE	TRUE
909	CD1A	ENSG00000158477	FALSE	TRUE	FALSE
910	CD1B	ENSG00000158485	FALSE	TRUE	FALSE
911	CD1C	ENSG00000158481	FALSE	TRUE	FALSE
912	CD1D	ENSG00000158473	FALSE	TRUE	FALSE
913	CD1E	ENSG00000158488	FALSE	TRUE	FALSE
914	CD2	ENSG00000116824	FALSE	TRUE	FALSE
915	CD3D	ENSG00000167286	FALSE	TRUE	FALSE
916	CD3E	ENSG00000198851	FALSE	TRUE	FALSE
917	CD3G	ENSG00000160654	FALSE	TRUE	FALSE
919	CD247	ENSG00000198821	FALSE	TRUE	FALSE
920	CD4	ENSG00000010610	FALSE	TRUE	FALSE
921	CD5	ENSG00000110448	FALSE	TRUE	FALSE
922	CD5L	ENSG00000073754	FALSE	TRUE	FALSE
923	CD6	ENSG00000013725	FALSE	TRUE	FALSE
924	CD7	ENSG00000173762	FALSE	TRUE	FALSE
925	CD8A	ENSG00000153563	FALSE	TRUE	FALSE
926	CD8B	ENSG00000172116	FALSE	TRUE	FALSE
928	CD9	ENSG00000010278	FALSE	TRUE	FALSE
929	CD14	ENSG00000170458	FALSE	TRUE	FALSE
930	CD19	ENSG00000177455	FALSE	TRUE	FALSE
931	MS4A1	ENSG00000156738	FALSE	TRUE	FALSE
932	MS4A3	ENSG00000149516	FALSE	TRUE	FALSE
933	CD22	ENSG00000012124	FALSE	TRUE	FALSE
939	CD27	ENSG00000139193	FALSE	TRUE	FALSE
940	CD28	ENSG00000178562	FALSE	TRUE	FALSE
941	CD80	ENSG00000121594	FALSE	TRUE	FALSE
942	CD86	ENSG00000114013	TRUE	TRUE	FALSE
943	TNFRSF8	ENSG00000120949	FALSE	TRUE	FALSE
944	TNFSF8	ENSG00000106952	FALSE	TRUE	FALSE
945	CD33	ENSG00000105383	FALSE	TRUE	FALSE
946	SIGLEC6	ENSG00000105492	FALSE	TRUE	FALSE
947	CD34	ENSG00000174059	FALSE	TRUE	FALSE
948	CD36	ENSG00000135218	FALSE	TRUE	TRUE
949	SCARB1	ENSG00000073060	FALSE	TRUE	TRUE
950	SCARB2	ENSG00000138760	FALSE	TRUE	TRUE
951	CD37	ENSG00000104894	FALSE	TRUE	FALSE
952	CD38	ENSG00000004468	FALSE	TRUE	FALSE
953	ENTPD1	ENSG00000138185	FALSE	TRUE	FALSE
954	ENTPD2	ENSG00000054179	FALSE	TRUE	FALSE
955	ENTPD6	ENSG00000197586	FALSE	TRUE	FALSE
956	ENTPD3	ENSG00000168032	FALSE	TRUE	FALSE
957	ENTPD5	ENSG00000187097	FALSE	TRUE	TRUE
958	CD40	ENSG00000101017	FALSE	TRUE	FALSE
959	CD40LG	ENSG00000102245	FALSE	FALSE	FALSE
960	CD44	ENSG00000026508	FALSE	TRUE	FALSE
961	CD47	ENSG00000196776	FALSE	TRUE	FALSE
962	CD48	ENSG00000117091	FALSE	TRUE	FALSE
963	CD53	ENSG00000143119	FALSE	TRUE	FALSE
965	CD58	ENSG00000116815	TRUE	TRUE	FALSE
966	CD59	ENSG00000085063	FALSE	TRUE	FALSE
967	CD63	ENSG00000135404	FALSE	TRUE	TRUE
968	CD68	ENSG00000129226	FALSE	TRUE	FALSE
969	CD69	ENSG00000110848	FALSE	TRUE	FALSE
970	CD70	ENSG00000125726	FALSE	FALSE	FALSE
971	CD72	ENSG00000137101	FALSE	TRUE	FALSE
972	CD74	ENSG00000019582	FALSE	TRUE	FALSE
973	CD79A	ENSG00000105369	TRUE	TRUE	FALSE
974	CD79B	ENSG00000007312	TRUE	TRUE	FALSE
975	CD81	ENSG00000110651	TRUE	TRUE	TRUE
976	ADGRE5	ENSG00000123146	FALSE	TRUE	FALSE
977	CD151	ENSG00000177697	FALSE	TRUE	TRUE
978	CDA	ENSG00000158825	FALSE	TRUE	TRUE
983	CDK1	ENSG00000170312	TRUE	TRUE	TRUE
984	CDK11B	ENSG00000248333	FALSE	TRUE	FALSE
987	LRBA	ENSG00000198589	FALSE	TRUE	FALSE
988	CDC5L	ENSG00000096401	TRUE	TRUE	TRUE
989	SEPT7	ENSG00000122545	TRUE	TRUE	TRUE
990	CDC6	ENSG00000094804	FALSE	TRUE	TRUE
991	CDC20	ENSG00000117399	FALSE	TRUE	TRUE
993	CDC25A	ENSG00000164045	TRUE	TRUE	FALSE
994	CDC25B	ENSG00000101224	FALSE	TRUE	FALSE
995	CDC25C	ENSG00000158402	FALSE	TRUE	FALSE
996	CDC27	ENSG00000004897	FALSE	TRUE	TRUE
997	CDC34	ENSG00000099804	FALSE	TRUE	FALSE
998	CDC42	ENSG00000070831	FALSE	TRUE	TRUE
999	CDH1	ENSG00000039068	FALSE	TRUE	FALSE
1000	CDH2	ENSG00000170558	FALSE	TRUE	FALSE
1001	CDH3	ENSG00000062038	FALSE	TRUE	FALSE
1002	CDH4	ENSG00000179242	FALSE	TRUE	FALSE
1003	CDH5	ENSG00000179776	FALSE	TRUE	FALSE
1004	CDH6	ENSG00000113361	TRUE	TRUE	FALSE
1005	CDH7	ENSG00000081138	FALSE	TRUE	FALSE
1006	CDH8	ENSG00000150394	TRUE	FALSE	FALSE
1007	CDH9	ENSG00000113100	TRUE	TRUE	FALSE
1008	CDH10	ENSG00000040731	FALSE	TRUE	FALSE
1009	CDH11	ENSG00000140937	TRUE	TRUE	FALSE
1010	CDH12	ENSG00000154162	FALSE	TRUE	FALSE
1012	CDH13	ENSG00000140945	FALSE	TRUE	FALSE
1013	CDH15	ENSG00000129910	FALSE	TRUE	FALSE
1014	CDH16	ENSG00000166589	FALSE	TRUE	FALSE
1015	CDH17	ENSG00000079112	FALSE	TRUE	FALSE
1016	CDH18	ENSG00000145526	FALSE	TRUE	FALSE
1017	CDK2	ENSG00000123374	TRUE	TRUE	TRUE
1018	CDK3	ENSG00000250506	FALSE	TRUE	FALSE
1019	CDK4	ENSG00000135446	TRUE	TRUE	FALSE
1020	CDK5	ENSG00000164885	TRUE	TRUE	TRUE
1021	CDK6	ENSG00000105810	TRUE	TRUE	TRUE
1022	CDK7	ENSG00000134058	FALSE	TRUE	TRUE
1024	CDK8	ENSG00000132964	TRUE	TRUE	TRUE
1025	CDK9	ENSG00000136807	FALSE	TRUE	TRUE
1026	CDKN1A	ENSG00000124762	FALSE	TRUE	FALSE
1027	CDKN1B	ENSG00000111276	FALSE	TRUE	FALSE
1028	CDKN1C	ENSG00000129757	FALSE	TRUE	FALSE
1029	CDKN2A	ENSG00000147889	FALSE	TRUE	FALSE
1030	CDKN2B	ENSG00000147883	FALSE	TRUE	FALSE
1031	CDKN2C	ENSG00000123080	FALSE	TRUE	FALSE
1032	CDKN2D	ENSG00000129355	FALSE	TRUE	FALSE
1033	CDKN3	ENSG00000100526	FALSE	TRUE	FALSE
1036	CDO1	ENSG00000129596	FALSE	TRUE	TRUE
1038	CDR1	ENSG00000184258	FALSE	FALSE	FALSE
1039	CDR2	ENSG00000140743	FALSE	TRUE	FALSE
1040	CDS1	ENSG00000163624	FALSE	TRUE	TRUE
1041	CDSN	ENSG00000204539	FALSE	TRUE	FALSE
1043	CD52	ENSG00000169442	FALSE	TRUE	FALSE
1044	CDX1	ENSG00000113722	FALSE	TRUE	FALSE
1045	CDX2	ENSG00000165556	FALSE	TRUE	FALSE
1046	CDX4	ENSG00000131264	FALSE	FALSE	FALSE
1047	CLGN	ENSG00000153132	FALSE	TRUE	TRUE
1048	CEACAM5	ENSG00000105388	FALSE	TRUE	FALSE
1050	CEBPA	ENSG00000245848	FALSE	TRUE	FALSE
1051	CEBPB	ENSG00000172216	FALSE	TRUE	FALSE
1052	CEBPD	ENSG00000221869	FALSE	TRUE	FALSE
1053	CEBPE	ENSG00000092067	FALSE	TRUE	FALSE
1054	CEBPG	ENSG00000153879	FALSE	TRUE	FALSE
1056	CEL	ENSG00000170835	FALSE	TRUE	FALSE
1058	CENPA	ENSG00000115163	FALSE	TRUE	FALSE
1059	CENPB	ENSG00000125817	TRUE	TRUE	FALSE
1060	CENPC	ENSG00000145241	FALSE	TRUE	FALSE
1062	CENPE	ENSG00000138778	FALSE	TRUE	FALSE
1063	CENPF	ENSG00000117724	FALSE	TRUE	FALSE
1066	CES1	ENSG00000198848	FALSE	TRUE	FALSE
1068	CETN1	ENSG00000177143	FALSE	FALSE	FALSE
1069	CETN2	ENSG00000147400	FALSE	TRUE	TRUE
1070	CETN3	ENSG00000153140	FALSE	TRUE	TRUE
1071	CETP	ENSG00000087237	TRUE	TRUE	FALSE
1072	CFL1	ENSG00000172757	FALSE	TRUE	FALSE
1073	CFL2	ENSG00000165410	FALSE	TRUE	TRUE
1075	CTSC	ENSG00000109861	FALSE	TRUE	FALSE
1080	CFTR	ENSG00000001626	FALSE	TRUE	FALSE
1081	CGA	ENSG00000135346	FALSE	TRUE	FALSE
1082	CGB3	ENSG00000104827	FALSE	FALSE	FALSE
1084	CEACAM3	ENSG00000170956	FALSE	TRUE	FALSE
1087	CEACAM7	ENSG00000007306	FALSE	TRUE	FALSE
1088	CEACAM8	ENSG00000124469	FALSE	TRUE	FALSE
1089	CEACAM4	ENSG00000105352	FALSE	FALSE	FALSE
1101	CHAD	ENSG00000136457	FALSE	TRUE	FALSE
1102	RCBTB2	ENSG00000136161	FALSE	TRUE	FALSE
1103	CHAT	ENSG00000070748	FALSE	FALSE	TRUE
1104	RCC1	ENSG00000180198	FALSE	TRUE	TRUE
1105	CHD1	ENSG00000153922	TRUE	TRUE	TRUE
1106	CHD2	ENSG00000173575	TRUE	FALSE	TRUE
1107	CHD3	ENSG00000170004	TRUE	TRUE	FALSE
1108	CHD4	ENSG00000111642	TRUE	TRUE	TRUE
1109	AKR1C4	ENSG00000198610	FALSE	FALSE	FALSE
1111	CHEK1	ENSG00000149554	FALSE	TRUE	TRUE
1112	FOXN3	ENSG00000053254	TRUE	TRUE	FALSE
1113	CHGA	ENSG00000100604	FALSE	TRUE	FALSE
1114	CHGB	ENSG00000089199	FALSE	TRUE	FALSE
1116	CHI3L1	ENSG00000133048	FALSE	TRUE	FALSE
1117	CHI3L2	ENSG00000064886	FALSE	TRUE	FALSE
1118	CHIT1	ENSG00000133063	FALSE	TRUE	TRUE
1119	CHKA	ENSG00000110721	FALSE	TRUE	TRUE
1120	CHKB	ENSG00000100288	FALSE	TRUE	TRUE
1121	CHM	ENSG00000188419	TRUE	TRUE	TRUE
1122	CHML	ENSG00000203668	FALSE	TRUE	TRUE
1123	CHN1	ENSG00000128656	FALSE	TRUE	TRUE
1124	CHN2	ENSG00000106069	FALSE	TRUE	TRUE
1128	CHRM1	ENSG00000168539	TRUE	FALSE	TRUE
1129	CHRM2	ENSG00000181072	FALSE	FALSE	FALSE
1130	LYST	ENSG00000143669	FALSE	TRUE	FALSE
1131	CHRM3	ENSG00000133019	TRUE	TRUE	FALSE
1132	CHRM4	ENSG00000180720	TRUE	FALSE	FALSE
1133	CHRM5	ENSG00000184984	FALSE	FALSE	FALSE
1134	CHRNA1	ENSG00000138435	FALSE	TRUE	FALSE
1135	CHRNA2	ENSG00000120903	FALSE	TRUE	TRUE
1136	CHRNA3	ENSG00000080644	FALSE	TRUE	TRUE
1137	CHRNA4	ENSG00000101204	FALSE	TRUE	TRUE
1138	CHRNA5	ENSG00000169684	FALSE	TRUE	FALSE
1139	CHRNA7	ENSG00000175344	FALSE	TRUE	TRUE
1140	CHRNB1	ENSG00000170175	FALSE	TRUE	FALSE
1141	CHRNB2	ENSG00000160716	FALSE	TRUE	TRUE
1142	CHRNB3	ENSG00000147432	FALSE	TRUE	FALSE
1143	CHRNB4	ENSG00000117971	FALSE	TRUE	FALSE
1144	CHRND	ENSG00000135902	FALSE	TRUE	FALSE
1145	CHRNE	ENSG00000108556	FALSE	TRUE	FALSE
1146	CHRNG	ENSG00000196811	FALSE	TRUE	FALSE
1147	CHUK	ENSG00000213341	TRUE	TRUE	FALSE
1149	CIDEA	ENSG00000176194	FALSE	TRUE	FALSE
1152	CKB	ENSG00000166165	FALSE	TRUE	FALSE
1153	CIRBP	ENSG00000099622	FALSE	TRUE	FALSE
1154	CISH	ENSG00000114737	FALSE	TRUE	FALSE
1155	TBCB	ENSG00000105254	FALSE	TRUE	TRUE
1158	CKM	ENSG00000104879	FALSE	TRUE	FALSE
1159	CKMT1B	ENSG00000237289	FALSE	TRUE	FALSE
1160	CKMT2	ENSG00000131730	FALSE	TRUE	FALSE
1161	ERCC8	ENSG00000049167	FALSE	TRUE	TRUE
1163	CKS1B	ENSG00000173207	FALSE	TRUE	TRUE
1164	CKS2	ENSG00000123975	FALSE	TRUE	TRUE
1173	AP2M1	ENSG00000161203	TRUE	TRUE	TRUE
1174	AP1S1	ENSG00000106367	FALSE	TRUE	FALSE
1175	AP2S1	ENSG00000042753	TRUE	TRUE	TRUE
1176	AP3S1	ENSG00000177879	FALSE	TRUE	TRUE
1178	CLC	ENSG00000105205	FALSE	FALSE	FALSE
1179	CLCA1	ENSG00000016490	FALSE	TRUE	FALSE
1180	CLCN1	ENSG00000188037	FALSE	TRUE	FALSE
1181	CLCN2	ENSG00000114859	FALSE	TRUE	TRUE
1182	CLCN3	ENSG00000109572	TRUE	TRUE	TRUE
1183	CLCN4	ENSG00000073464	TRUE	TRUE	FALSE
1184	CLCN5	ENSG00000171365	TRUE	TRUE	FALSE
1185	CLCN6	ENSG00000011021	FALSE	TRUE	FALSE
1186	CLCN7	ENSG00000103249	TRUE	TRUE	TRUE
1187	CLCNKA	ENSG00000186510	FALSE	FALSE	FALSE
1188	CLCNKB	ENSG00000184908	FALSE	FALSE	FALSE
1191	CLU	ENSG00000120885	FALSE	TRUE	FALSE
1192	CLIC1	ENSG00000213719	FALSE	TRUE	FALSE
1193	CLIC2	ENSG00000155962	FALSE	TRUE	FALSE
1195	CLK1	ENSG00000013441	FALSE	TRUE	FALSE
1196	CLK2	ENSG00000176444	TRUE	TRUE	TRUE
1198	CLK3	ENSG00000179335	TRUE	TRUE	FALSE
1200	TPP1	ENSG00000166340	FALSE	TRUE	FALSE
1201	CLN3	ENSG00000188603	FALSE	TRUE	TRUE
1203	CLN5	ENSG00000102805	FALSE	TRUE	FALSE
1207	CLNS1A	ENSG00000074201	FALSE	TRUE	FALSE
1208	CLPS	ENSG00000137392	FALSE	TRUE	FALSE
1209	CLPTM1	ENSG00000104853	TRUE	TRUE	TRUE
1211	CLTA	ENSG00000122705	TRUE	TRUE	TRUE
1212	CLTB	ENSG00000175416	FALSE	TRUE	FALSE
1213	CLTC	ENSG00000141367	TRUE	TRUE	TRUE
1215	CMA1	ENSG00000092009	FALSE	TRUE	FALSE
1230	CCR1	ENSG00000163823	FALSE	TRUE	FALSE
1232	CCR3	ENSG00000183625	FALSE	FALSE	FALSE
1233	CCR4	ENSG00000183813	FALSE	FALSE	FALSE
1234	CCR5	ENSG00000160791	FALSE	TRUE	FALSE
1235	CCR6	ENSG00000112486	FALSE	FALSE	FALSE
1236	CCR7	ENSG00000126353	FALSE	TRUE	FALSE
1237	CCR8	ENSG00000179934	FALSE	FALSE	FALSE
1238	ACKR2	ENSG00000144648	FALSE	FALSE	FALSE
1240	CMKLR1	ENSG00000174600	FALSE	TRUE	FALSE
1241	LTB4R	ENSG00000213903	FALSE	TRUE	FALSE
1244	ABCC2	ENSG00000023839	FALSE	FALSE	FALSE
1258	CNGB1	ENSG00000070729	FALSE	TRUE	TRUE
1259	CNGA1	ENSG00000198515	FALSE	TRUE	FALSE
1260	CNGA2	ENSG00000183862	FALSE	FALSE	FALSE
1261	CNGA3	ENSG00000144191	FALSE	FALSE	TRUE
1262	CNGA4	ENSG00000132259	FALSE	FALSE	FALSE
1263	PLK3	ENSG00000173846	FALSE	TRUE	FALSE
1264	CNN1	ENSG00000130176	FALSE	TRUE	TRUE
1265	CNN2	ENSG00000064666	FALSE	TRUE	TRUE
1266	CNN3	ENSG00000117519	FALSE	TRUE	TRUE
1267	CNP	ENSG00000173786	FALSE	TRUE	FALSE
1268	CNR1	ENSG00000118432	FALSE	TRUE	FALSE
1269	CNR2	ENSG00000188822	FALSE	FALSE	FALSE
1270	CNTF	ENSG00000242689	FALSE	TRUE	FALSE
1271	CNTFR	ENSG00000122756	TRUE	TRUE	FALSE
1272	CNTN1	ENSG00000018236	TRUE	TRUE	FALSE
1277	COL1A1	ENSG00000108821	TRUE	TRUE	FALSE
1278	COL1A2	ENSG00000164692	TRUE	TRUE	FALSE
1280	COL2A1	ENSG00000139219	TRUE	TRUE	FALSE
1281	COL3A1	ENSG00000168542	TRUE	TRUE	FALSE
1282	COL4A1	ENSG00000187498	TRUE	TRUE	FALSE
1284	COL4A2	ENSG00000134871	FALSE	TRUE	TRUE
1285	COL4A3	ENSG00000169031	FALSE	TRUE	FALSE
1286	COL4A4	ENSG00000081052	FALSE	TRUE	FALSE
1287	COL4A5	ENSG00000188153	TRUE	TRUE	FALSE
1288	COL4A6	ENSG00000197565	TRUE	TRUE	FALSE
1289	COL5A1	ENSG00000130635	TRUE	TRUE	FALSE
1290	COL5A2	ENSG00000204262	TRUE	TRUE	FALSE
1291	COL6A1	ENSG00000142156	TRUE	TRUE	FALSE
1292	COL6A2	ENSG00000142173	FALSE	TRUE	FALSE
1293	COL6A3	ENSG00000163359	FALSE	TRUE	FALSE
1294	COL7A1	ENSG00000114270	FALSE	TRUE	FALSE
1295	COL8A1	ENSG00000144810	FALSE	TRUE	FALSE
1296	COL8A2	ENSG00000171812	FALSE	TRUE	FALSE
1297	COL9A1	ENSG00000112280	FALSE	TRUE	FALSE
1298	COL9A2	ENSG00000049089	FALSE	TRUE	FALSE
1299	COL9A3	ENSG00000092758	FALSE	TRUE	FALSE
1300	COL10A1	ENSG00000123500	FALSE	TRUE	FALSE
1301	COL11A1	ENSG00000060718	TRUE	TRUE	FALSE
1302	COL11A2	ENSG00000204248	TRUE	TRUE	FALSE
1303	COL12A1	ENSG00000111799	TRUE	TRUE	FALSE
1305	COL13A1	ENSG00000197467	FALSE	TRUE	FALSE
1306	COL15A1	ENSG00000204291	FALSE	TRUE	TRUE
1307	COL16A1	ENSG00000084636	FALSE	TRUE	FALSE
1308	COL17A1	ENSG00000065618	FALSE	TRUE	FALSE
1310	COL19A1	ENSG00000082293	FALSE	TRUE	FALSE
1311	COMP	ENSG00000105664	FALSE	TRUE	TRUE
1312	COMT	ENSG00000093010	FALSE	FALSE	TRUE
1314	COPA	ENSG00000122218	TRUE	TRUE	TRUE
1315	COPB1	ENSG00000129083	TRUE	TRUE	TRUE
1316	KLF6	ENSG00000067082	TRUE	TRUE	FALSE
1317	SLC31A1	ENSG00000136868	FALSE	TRUE	TRUE
1318	SLC31A2	ENSG00000136867	FALSE	TRUE	FALSE
1325	CORT	ENSG00000241563	FALSE	TRUE	FALSE
1326	MAP3K8	ENSG00000107968	FALSE	TRUE	FALSE
1327	COX4I1	ENSG00000131143	FALSE	TRUE	TRUE
1329	COX5B	ENSG00000135940	FALSE	TRUE	FALSE
1337	COX6A1	ENSG00000111775	FALSE	TRUE	TRUE
1339	COX6A2	ENSG00000156885	FALSE	FALSE	FALSE
1340	COX6B1	ENSG00000126267	FALSE	TRUE	TRUE
1345	COX6C	ENSG00000164919	FALSE	TRUE	FALSE
1346	COX7A1	ENSG00000161281	FALSE	TRUE	FALSE
1347	COX7A2	ENSG00000112695	FALSE	TRUE	FALSE
1349	COX7B	ENSG00000131174	FALSE	TRUE	FALSE
1350	COX7C	ENSG00000127184	FALSE	FALSE	FALSE
1351	COX8A	ENSG00000176340	FALSE	TRUE	FALSE
1352	COX10	ENSG00000006695	FALSE	TRUE	TRUE
1353	COX11	ENSG00000166260	FALSE	TRUE	TRUE
1355	COX15	ENSG00000014919	FALSE	TRUE	TRUE
1356	CP	ENSG00000047457	FALSE	TRUE	FALSE
1357	CPA1	ENSG00000091704	FALSE	TRUE	TRUE
1358	CPA2	ENSG00000158516	FALSE	TRUE	TRUE
1359	CPA3	ENSG00000163751	FALSE	TRUE	TRUE
1360	CPB1	ENSG00000153002	FALSE	TRUE	TRUE
1361	CPB2	ENSG00000080618	FALSE	TRUE	TRUE
1362	CPD	ENSG00000108582	FALSE	TRUE	TRUE
1363	CPE	ENSG00000109472	TRUE	TRUE	TRUE
1364	CLDN4	ENSG00000189143	FALSE	TRUE	FALSE
1365	CLDN3	ENSG00000165215	FALSE	TRUE	FALSE
1366	CLDN7	ENSG00000181885	FALSE	TRUE	FALSE
1368	CPM	ENSG00000135678	FALSE	TRUE	TRUE
1369	CPN1	ENSG00000120054	FALSE	TRUE	FALSE
1370	CPN2	ENSG00000178772	FALSE	TRUE	FALSE
1371	CPOX	ENSG00000080819	FALSE	TRUE	TRUE
1373	CPS1	ENSG00000021826	FALSE	TRUE	FALSE
1374	CPT1A	ENSG00000110090	TRUE	TRUE	FALSE
1375	CPT1B	ENSG00000205560	FALSE	TRUE	FALSE
1376	CPT2	ENSG00000157184	FALSE	TRUE	TRUE
1378	CR1	ENSG00000203710	FALSE	TRUE	FALSE
1379	CR1L	ENSG00000197721	FALSE	TRUE	FALSE
1380	CR2	ENSG00000117322	FALSE	TRUE	FALSE
1381	CRABP1	ENSG00000166426	FALSE	FALSE	FALSE
1382	CRABP2	ENSG00000143320	FALSE	TRUE	FALSE
1384	CRAT	ENSG00000095321	FALSE	TRUE	TRUE
1385	CREB1	ENSG00000118260	TRUE	TRUE	FALSE
1386	ATF2	ENSG00000115966	FALSE	TRUE	FALSE
1387	CREBBP	ENSG00000005339	TRUE	TRUE	FALSE
1388	ATF6B	ENSG00000213676	FALSE	TRUE	FALSE
1389	CREBL2	ENSG00000111269	FALSE	TRUE	TRUE
1390	CREM	ENSG00000095794	FALSE	TRUE	FALSE
1392	CRH	ENSG00000147571	FALSE	TRUE	FALSE
1393	CRHBP	ENSG00000145708	TRUE	TRUE	TRUE
1394	CRHR1	ENSG00000120088	FALSE	TRUE	TRUE
1395	CRHR2	ENSG00000106113	FALSE	FALSE	TRUE
1396	CRIP1	ENSG00000213145	FALSE	FALSE	TRUE
1397	CRIP2	ENSG00000182809	FALSE	TRUE	FALSE
1398	CRK	ENSG00000167193	FALSE	TRUE	TRUE
1399	CRKL	ENSG00000099942	FALSE	TRUE	FALSE
1400	CRMP1	ENSG00000072832	TRUE	TRUE	FALSE
1401	CRP	ENSG00000132693	FALSE	TRUE	FALSE
1404	HAPLN1	ENSG00000145681	FALSE	TRUE	FALSE
1406	CRX	ENSG00000105392	FALSE	TRUE	FALSE
1407	CRY1	ENSG00000008405	FALSE	TRUE	FALSE
1408	CRY2	ENSG00000121671	FALSE	TRUE	FALSE
1409	CRYAA	ENSG00000160202	FALSE	TRUE	FALSE
1410	CRYAB	ENSG00000109846	FALSE	TRUE	TRUE
1411	CRYBA1	ENSG00000108255	FALSE	FALSE	FALSE
1412	CRYBA2	ENSG00000163499	FALSE	FALSE	FALSE
1413	CRYBA4	ENSG00000196431	FALSE	FALSE	FALSE
1414	CRYBB1	ENSG00000100122	FALSE	FALSE	FALSE
1415	CRYBB2	ENSG00000244752	FALSE	TRUE	FALSE
1417	CRYBB3	ENSG00000100053	FALSE	FALSE	FALSE
1418	CRYGA	ENSG00000168582	FALSE	FALSE	FALSE
1419	CRYGB	ENSG00000182187	FALSE	FALSE	FALSE
1420	CRYGC	ENSG00000163254	FALSE	FALSE	FALSE
1421	CRYGD	ENSG00000118231	FALSE	FALSE	FALSE
1427	CRYGS	ENSG00000213139	FALSE	TRUE	FALSE
1428	CRYM	ENSG00000103316	FALSE	TRUE	TRUE
1429	CRYZ	ENSG00000116791	FALSE	TRUE	TRUE
1431	CS	ENSG00000062485	TRUE	TRUE	TRUE
1432	MAPK14	ENSG00000112062	TRUE	TRUE	TRUE
1434	CSE1L	ENSG00000124207	TRUE	TRUE	TRUE
1435	CSF1	ENSG00000184371	TRUE	TRUE	FALSE
1436	CSF1R	ENSG00000182578	TRUE	TRUE	FALSE
1437	CSF2	ENSG00000164400	FALSE	TRUE	FALSE
1438	CSF2RA	ENSG00000198223	FALSE	TRUE	FALSE
1439	CSF2RB	ENSG00000100368	FALSE	TRUE	FALSE
1440	CSF3	ENSG00000108342	FALSE	TRUE	FALSE
1441	CSF3R	ENSG00000119535	FALSE	TRUE	FALSE
1442	CSH1	ENSG00000136488	FALSE	TRUE	FALSE
1443	CSH2	ENSG00000213218	FALSE	TRUE	FALSE
1444	CSHL1	ENSG00000204414	FALSE	TRUE	FALSE
1445	CSK	ENSG00000103653	TRUE	TRUE	TRUE
1446	CSN1S1	ENSG00000126545	FALSE	TRUE	FALSE
1447	CSN2	ENSG00000135222	FALSE	TRUE	FALSE
1448	CSN3	ENSG00000171209	FALSE	TRUE	FALSE
1452	CSNK1A1	ENSG00000113712	TRUE	TRUE	TRUE
1453	CSNK1D	ENSG00000141551	TRUE	TRUE	TRUE
1454	CSNK1E	ENSG00000213923	TRUE	TRUE	TRUE
1455	CSNK1G2	ENSG00000133275	TRUE	TRUE	TRUE
1456	CSNK1G3	ENSG00000151292	FALSE	TRUE	TRUE
1457	CSNK2A1	ENSG00000101266	TRUE	TRUE	TRUE
1459	CSNK2A2	ENSG00000070770	TRUE	TRUE	TRUE
1460	CSNK2B	ENSG00000204435	TRUE	TRUE	TRUE
1462	VCAN	ENSG00000038427	TRUE	TRUE	FALSE
1463	NCAN	ENSG00000130287	FALSE	TRUE	FALSE
1464	CSPG4	ENSG00000173546	FALSE	TRUE	FALSE
1465	CSRP1	ENSG00000159176	FALSE	TRUE	FALSE
1466	CSRP2	ENSG00000175183	FALSE	TRUE	TRUE
1468	SLC25A10	ENSG00000183048	FALSE	TRUE	TRUE
1469	CST1	ENSG00000170373	FALSE	TRUE	FALSE
1470	CST2	ENSG00000170369	FALSE	TRUE	FALSE
1471	CST3	ENSG00000101439	FALSE	TRUE	FALSE
1472	CST4	ENSG00000101441	FALSE	TRUE	FALSE
1473	CST5	ENSG00000170367	FALSE	TRUE	FALSE
1474	CST6	ENSG00000175315	FALSE	TRUE	FALSE
1475	CSTA	ENSG00000121552	FALSE	TRUE	FALSE
1476	CSTB	ENSG00000160213	FALSE	TRUE	FALSE
1477	CSTF1	ENSG00000101138	TRUE	TRUE	TRUE
1478	CSTF2	ENSG00000101811	FALSE	TRUE	FALSE
1479	CSTF3	ENSG00000176102	TRUE	TRUE	TRUE
1482	NKX2-5	ENSG00000183072	FALSE	TRUE	FALSE
1485	CTAG1B	ENSG00000184033	FALSE	TRUE	FALSE
1486	CTBS	ENSG00000117151	FALSE	TRUE	FALSE
1487	CTBP1	ENSG00000159692	TRUE	TRUE	TRUE
1488	CTBP2	ENSG00000175029	FALSE	TRUE	TRUE
1489	CTF1	ENSG00000150281	FALSE	TRUE	FALSE
1490	CTGF	ENSG00000118523	FALSE	TRUE	FALSE
1491	CTH	ENSG00000116761	FALSE	TRUE	TRUE
1493	CTLA4	ENSG00000163599	FALSE	FALSE	FALSE
1495	CTNNA1	ENSG00000044115	TRUE	TRUE	FALSE
1496	CTNNA2	ENSG00000066032	FALSE	FALSE	TRUE
1497	CTNS	ENSG00000040531	FALSE	TRUE	TRUE
1499	CTNNB1	ENSG00000168036	TRUE	TRUE	TRUE
1500	CTNND1	ENSG00000198561	TRUE	TRUE	FALSE
1501	CTNND2	ENSG00000169862	TRUE	TRUE	TRUE
1503	CTPS1	ENSG00000171793	TRUE	TRUE	TRUE
1504	CTRB1	ENSG00000168925	FALSE	TRUE	TRUE
1506	CTRL	ENSG00000141086	FALSE	TRUE	FALSE
1508	CTSB	ENSG00000164733	FALSE	TRUE	TRUE
1509	CTSD	ENSG00000117984	FALSE	TRUE	TRUE
1510	CTSE	ENSG00000196188	FALSE	TRUE	FALSE
1511	CTSG	ENSG00000100448	FALSE	TRUE	FALSE
1512	CTSH	ENSG00000103811	FALSE	TRUE	FALSE
1513	CTSK	ENSG00000143387	FALSE	TRUE	FALSE
1514	CTSL	ENSG00000135047	FALSE	TRUE	FALSE
1515	CTSV	ENSG00000136943	FALSE	TRUE	TRUE
1519	CTSO	ENSG00000256043	FALSE	TRUE	FALSE
1520	CTSS	ENSG00000163131	FALSE	TRUE	FALSE
1521	CTSW	ENSG00000172543	FALSE	TRUE	FALSE
1522	CTSZ	ENSG00000101160	FALSE	TRUE	TRUE
1523	CUX1	ENSG00000257923	TRUE	TRUE	FALSE
1524	CX3CR1	ENSG00000168329	FALSE	TRUE	FALSE
1525	CXADR	ENSG00000154639	FALSE	TRUE	FALSE
1527	TEX28	ENSG00000278057	FALSE	FALSE	FALSE
1528	CYB5A	ENSG00000166347	FALSE	TRUE	TRUE
1534	CYB561	ENSG00000008283	FALSE	TRUE	TRUE
1535	CYBA	ENSG00000051523	FALSE	TRUE	FALSE
1536	CYBB	ENSG00000165168	TRUE	TRUE	FALSE
1537	CYC1	ENSG00000179091	TRUE	TRUE	TRUE
1538	CYLC1	ENSG00000183035	FALSE	FALSE	FALSE
1539	CYLC2	ENSG00000155833	FALSE	FALSE	FALSE
1540	CYLD	ENSG00000083799	FALSE	TRUE	TRUE
1543	CYP1A1	ENSG00000140465	FALSE	TRUE	FALSE
1544	CYP1A2	ENSG00000140505	FALSE	FALSE	FALSE
1545	CYP1B1	ENSG00000138061	FALSE	TRUE	FALSE
1548	CYP2A6	ENSG00000255974	FALSE	TRUE	TRUE
1549	CYP2A7	ENSG00000198077	FALSE	TRUE	TRUE
1551	CYP3A7	ENSG00000160870	FALSE	FALSE	FALSE
1553	CYP2A13	ENSG00000197838	FALSE	FALSE	TRUE
1555	CYP2B6	ENSG00000197408	FALSE	TRUE	FALSE
1557	CYP2C19	ENSG00000165841	FALSE	TRUE	FALSE
1558	CYP2C8	ENSG00000138115	FALSE	TRUE	FALSE
1559	CYP2C9	ENSG00000138109	FALSE	TRUE	FALSE
1562	CYP2C18	ENSG00000108242	FALSE	TRUE	FALSE
1564	CYP2D7	ENSG00000205702	FALSE	FALSE	FALSE
1565	CYP2D6	ENSG00000100197	FALSE	FALSE	FALSE
1571	CYP2E1	ENSG00000130649	FALSE	TRUE	FALSE
1572	CYP2F1	ENSG00000197446	FALSE	TRUE	FALSE
1573	CYP2J2	ENSG00000134716	FALSE	TRUE	TRUE
1576	CYP3A4	ENSG00000160868	FALSE	TRUE	TRUE
1577	CYP3A5	ENSG00000106258	FALSE	TRUE	TRUE
1579	CYP4A11	ENSG00000187048	FALSE	FALSE	FALSE
1580	CYP4B1	ENSG00000142973	FALSE	TRUE	FALSE
1581	CYP7A1	ENSG00000167910	FALSE	FALSE	FALSE
1582	CYP8B1	ENSG00000180432	FALSE	FALSE	FALSE
1583	CYP11A1	ENSG00000140459	FALSE	TRUE	FALSE
1584	CYP11B1	ENSG00000160882	FALSE	FALSE	FALSE
1585	CYP11B2	ENSG00000179142	FALSE	FALSE	FALSE
1586	CYP17A1	ENSG00000148795	FALSE	TRUE	FALSE
1588	CYP19A1	ENSG00000137869	FALSE	FALSE	FALSE
1589	CYP21A2	ENSG00000231852	FALSE	TRUE	FALSE
1591	CYP24A1	ENSG00000019186	FALSE	TRUE	TRUE
1592	CYP26A1	ENSG00000095596	FALSE	FALSE	FALSE
1593	CYP27A1	ENSG00000135929	FALSE	TRUE	TRUE
1594	CYP27B1	ENSG00000111012	FALSE	TRUE	FALSE
1595	CYP51A1	ENSG00000001630	FALSE	TRUE	TRUE
1600	DAB1	ENSG00000173406	FALSE	TRUE	FALSE
1601	DAB2	ENSG00000153071	TRUE	TRUE	FALSE
1602	DACH1	ENSG00000276644	FALSE	TRUE	FALSE
1603	DAD1	ENSG00000129562	FALSE	TRUE	TRUE
1604	CD55	ENSG00000196352	FALSE	TRUE	FALSE
1605	DAG1	ENSG00000173402	TRUE	TRUE	FALSE
1606	DGKA	ENSG00000065357	TRUE	TRUE	FALSE
1607	DGKB	ENSG00000136267	FALSE	FALSE	TRUE
1608	DGKG	ENSG00000058866	FALSE	TRUE	FALSE
1609	DGKQ	ENSG00000145214	FALSE	TRUE	TRUE
1610	DAO	ENSG00000110887	FALSE	FALSE	TRUE
1611	DAP	ENSG00000112977	FALSE	TRUE	FALSE
1612	DAPK1	ENSG00000196730	TRUE	TRUE	TRUE
1613	DAPK3	ENSG00000167657	FALSE	TRUE	FALSE
1615	DARS	ENSG00000115866	FALSE	TRUE	TRUE
1616	DAXX	ENSG00000204209	FALSE	TRUE	FALSE
1617	DAZ1	ENSG00000188120	FALSE	FALSE	FALSE
1618	DAZL	ENSG00000092345	TRUE	FALSE	FALSE
1620	BRINP1	ENSG00000078725	TRUE	TRUE	FALSE
1621	DBH	ENSG00000123454	FALSE	TRUE	TRUE
1622	DBI	ENSG00000155368	FALSE	TRUE	TRUE
1627	DBN1	ENSG00000113758	TRUE	TRUE	FALSE
1628	DBP	ENSG00000105516	FALSE	TRUE	FALSE
1629	DBT	ENSG00000137992	FALSE	TRUE	TRUE
1630	DCC	ENSG00000187323	TRUE	TRUE	TRUE
1632	ECI1	ENSG00000167969	FALSE	TRUE	FALSE
1633	DCK	ENSG00000156136	FALSE	TRUE	FALSE
1634	DCN	ENSG00000011465	FALSE	TRUE	FALSE
1635	DCTD	ENSG00000129187	FALSE	TRUE	TRUE
1636	ACE	ENSG00000159640	FALSE	TRUE	FALSE
1638	DCT	ENSG00000080166	FALSE	TRUE	FALSE
1639	DCTN1	ENSG00000204843	FALSE	TRUE	TRUE
1641	DCX	ENSG00000077279	FALSE	TRUE	FALSE
1642	DDB1	ENSG00000167986	TRUE	TRUE	TRUE
1643	DDB2	ENSG00000134574	FALSE	TRUE	FALSE
1644	DDC	ENSG00000132437	FALSE	FALSE	TRUE
1645	AKR1C1	ENSG00000187134	FALSE	TRUE	FALSE
1646	AKR1C2	ENSG00000151632	FALSE	TRUE	FALSE
1647	GADD45A	ENSG00000116717	FALSE	TRUE	FALSE
1649	DDIT3	ENSG00000175197	FALSE	TRUE	FALSE
1650	DDOST	ENSG00000244038	FALSE	TRUE	TRUE
1652	DDT	ENSG00000099977	FALSE	TRUE	FALSE
1653	DDX1	ENSG00000079785	FALSE	TRUE	TRUE
1654	DDX3X	ENSG00000215301	TRUE	TRUE	TRUE
1655	DDX5	ENSG00000108654	TRUE	TRUE	TRUE
1656	DDX6	ENSG00000110367	FALSE	TRUE	TRUE
1657	DMXL1	ENSG00000172869	TRUE	TRUE	FALSE
1659	DHX8	ENSG00000067596	TRUE	TRUE	TRUE
1660	DHX9	ENSG00000135829	TRUE	TRUE	TRUE
1662	DDX10	ENSG00000178105	FALSE	TRUE	TRUE
1663	DDX11	ENSG00000013573	FALSE	TRUE	TRUE
1665	DHX15	ENSG00000109606	TRUE	TRUE	TRUE
1666	DECR1	ENSG00000104325	FALSE	TRUE	FALSE
1667	DEFA1	ENSG00000206047	FALSE	FALSE	FALSE
1668	DEFA3	ENSG00000239839	FALSE	TRUE	FALSE
1669	DEFA4	ENSG00000164821	FALSE	TRUE	FALSE
1670	DEFA5	ENSG00000164816	FALSE	TRUE	FALSE
1671	DEFA6	ENSG00000164822	FALSE	TRUE	FALSE
1672	DEFB1	ENSG00000164825	FALSE	TRUE	FALSE
1673	DEFB4A	ENSG00000171711	FALSE	TRUE	FALSE
1674	DES	ENSG00000175084	FALSE	TRUE	FALSE
1675	CFD	ENSG00000197766	FALSE	TRUE	FALSE
1676	DFFA	ENSG00000160049	FALSE	TRUE	FALSE
1677	DFFB	ENSG00000169598	FALSE	TRUE	TRUE
1678	TIMM8A	ENSG00000126953	FALSE	TRUE	FALSE
1687	DFNA5	ENSG00000105928	FALSE	TRUE	FALSE
1690	COCH	ENSG00000100473	FALSE	TRUE	FALSE
1716	DGUOK	ENSG00000114956	FALSE	TRUE	FALSE
1717	DHCR7	ENSG00000172893	FALSE	TRUE	FALSE
1718	DHCR24	ENSG00000116133	TRUE	TRUE	TRUE
1719	DHFR	ENSG00000228716	FALSE	TRUE	TRUE
1723	DHODH	ENSG00000102967	FALSE	TRUE	TRUE
1725	DHPS	ENSG00000095059	FALSE	TRUE	TRUE
1727	CYB5R3	ENSG00000100243	FALSE	TRUE	FALSE
1728	NQO1	ENSG00000181019	FALSE	TRUE	FALSE
1729	DIAPH1	ENSG00000131504	FALSE	TRUE	TRUE
1730	DIAPH2	ENSG00000147202	TRUE	TRUE	FALSE
1731	SEPT1	ENSG00000180096	FALSE	TRUE	FALSE
1733	DIO1	ENSG00000211452	FALSE	FALSE	FALSE
1734	DIO2	ENSG00000211448	FALSE	TRUE	FALSE
1735	DIO3	ENSG00000197406	FALSE	FALSE	FALSE
1736	DKC1	ENSG00000130826	TRUE	TRUE	TRUE
1737	DLAT	ENSG00000150768	FALSE	TRUE	TRUE
1738	DLD	ENSG00000091140	FALSE	TRUE	TRUE
1739	DLG1	ENSG00000075711	TRUE	TRUE	TRUE
1740	DLG2	ENSG00000150672	FALSE	TRUE	TRUE
1741	DLG3	ENSG00000082458	TRUE	TRUE	FALSE
1742	DLG4	ENSG00000132535	TRUE	TRUE	FALSE
1743	DLST	ENSG00000119689	TRUE	TRUE	TRUE
1745	DLX1	ENSG00000144355	TRUE	TRUE	FALSE
1746	DLX2	ENSG00000115844	FALSE	TRUE	FALSE
1747	DLX3	ENSG00000064195	FALSE	FALSE	FALSE
1748	DLX4	ENSG00000108813	FALSE	FALSE	FALSE
1749	DLX5	ENSG00000105880	FALSE	FALSE	FALSE
1750	DLX6	ENSG00000006377	FALSE	FALSE	FALSE
1755	DMBT1	ENSG00000187908	FALSE	TRUE	FALSE
1756	DMD	ENSG00000198947	TRUE	TRUE	TRUE
1757	SARDH	ENSG00000123453	FALSE	TRUE	TRUE
1758	DMP1	ENSG00000152592	FALSE	TRUE	FALSE
1759	DNM1	ENSG00000106976	TRUE	TRUE	TRUE
1760	DMPK	ENSG00000104936	FALSE	TRUE	FALSE
1761	DMRT1	ENSG00000137090	FALSE	FALSE	FALSE
1762	DMWD	ENSG00000185800	FALSE	TRUE	FALSE
1763	DNA2	ENSG00000138346	FALSE	TRUE	TRUE
1767	DNAH5	ENSG00000039139	FALSE	FALSE	TRUE
1768	DNAH6	ENSG00000115423	FALSE	FALSE	TRUE
1769	DNAH8	ENSG00000124721	FALSE	FALSE	FALSE
1770	DNAH9	ENSG00000007174	FALSE	FALSE	TRUE
1773	DNASE1	ENSG00000213918	FALSE	TRUE	FALSE
1774	DNASE1L1	ENSG00000013563	FALSE	TRUE	FALSE
1775	DNASE1L2	ENSG00000167968	FALSE	TRUE	FALSE
1776	DNASE1L3	ENSG00000163687	FALSE	TRUE	FALSE
1777	DNASE2	ENSG00000105612	FALSE	TRUE	TRUE
1778	DYNC1H1	ENSG00000197102	TRUE	TRUE	TRUE
1780	DYNC1I1	ENSG00000158560	FALSE	TRUE	FALSE
1781	DYNC1I2	ENSG00000077380	FALSE	TRUE	FALSE
1783	DYNC1LI2	ENSG00000135720	FALSE	TRUE	TRUE
1785	DNM2	ENSG00000079805	TRUE	TRUE	FALSE
1786	DNMT1	ENSG00000130816	TRUE	TRUE	FALSE
1787	TRDMT1	ENSG00000107614	FALSE	TRUE	TRUE
1788	DNMT3A	ENSG00000119772	FALSE	TRUE	FALSE
1789	DNMT3B	ENSG00000088305	TRUE	TRUE	FALSE
1791	DNTT	ENSG00000107447	FALSE	TRUE	FALSE
1793	DOCK1	ENSG00000150760	FALSE	TRUE	TRUE
1794	DOCK2	ENSG00000134516	TRUE	TRUE	FALSE
1795	DOCK3	ENSG00000088538	TRUE	FALSE	TRUE
1796	DOK1	ENSG00000115325	FALSE	TRUE	FALSE
1797	DXO	ENSG00000204348	FALSE	TRUE	TRUE
1798	DPAGT1	ENSG00000172269	FALSE	TRUE	TRUE
1800	DPEP1	ENSG00000015413	FALSE	TRUE	TRUE
1801	DPH1	ENSG00000108963	FALSE	TRUE	TRUE
1802	DPH2	ENSG00000132768	FALSE	TRUE	TRUE
1803	DPP4	ENSG00000197635	FALSE	TRUE	TRUE
1804	DPP6	ENSG00000130226	TRUE	TRUE	FALSE
1805	DPT	ENSG00000143196	FALSE	TRUE	FALSE
1806	DPYD	ENSG00000188641	FALSE	TRUE	TRUE
1807	DPYS	ENSG00000147647	FALSE	FALSE	TRUE
1808	DPYSL2	ENSG00000092964	TRUE	TRUE	FALSE
1809	DPYSL3	ENSG00000113657	TRUE	TRUE	FALSE
1810	DR1	ENSG00000117505	FALSE	TRUE	TRUE
1811	SLC26A3	ENSG00000091138	FALSE	FALSE	TRUE
1812	DRD1	ENSG00000184845	FALSE	TRUE	FALSE
1813	DRD2	ENSG00000149295	FALSE	TRUE	TRUE
1814	DRD3	ENSG00000151577	FALSE	TRUE	TRUE
1815	DRD4	ENSG00000069696	FALSE	TRUE	FALSE
1816	DRD5	ENSG00000169676	FALSE	TRUE	FALSE
1819	DRG2	ENSG00000108591	FALSE	TRUE	TRUE
1820	ARID3A	ENSG00000116017	FALSE	TRUE	FALSE
1821	DRP2	ENSG00000102385	FALSE	TRUE	FALSE
1822	ATN1	ENSG00000111676	TRUE	TRUE	FALSE
1823	DSC1	ENSG00000134765	FALSE	TRUE	FALSE
1824	DSC2	ENSG00000134755	FALSE	TRUE	FALSE
1825	DSC3	ENSG00000134762	FALSE	TRUE	FALSE
1826	DSCAM	ENSG00000171587	TRUE	TRUE	TRUE
1827	RCAN1	ENSG00000159200	FALSE	TRUE	FALSE
1828	DSG1	ENSG00000134760	TRUE	TRUE	FALSE
1829	DSG2	ENSG00000046604	FALSE	TRUE	FALSE
1830	DSG3	ENSG00000134757	FALSE	TRUE	FALSE
1831	TSC22D3	ENSG00000157514	FALSE	TRUE	FALSE
1832	DSP	ENSG00000096696	TRUE	TRUE	FALSE
1833	EPYC	ENSG00000083782	FALSE	TRUE	FALSE
1834	DSPP	ENSG00000152591	FALSE	TRUE	FALSE
1836	SLC26A2	ENSG00000155850	FALSE	TRUE	FALSE
1837	DTNA	ENSG00000134769	TRUE	TRUE	FALSE
1838	DTNB	ENSG00000138101	FALSE	TRUE	TRUE
1839	HBEGF	ENSG00000113070	FALSE	TRUE	FALSE
1840	DTX1	ENSG00000135144	FALSE	TRUE	FALSE
1841	DTYMK	ENSG00000168393	FALSE	TRUE	TRUE
1842	ECM2	ENSG00000106823	FALSE	TRUE	FALSE
1843	DUSP1	ENSG00000120129	FALSE	TRUE	FALSE
1844	DUSP2	ENSG00000158050	FALSE	TRUE	FALSE
1845	DUSP3	ENSG00000108861	FALSE	TRUE	FALSE
1846	DUSP4	ENSG00000120875	FALSE	TRUE	FALSE
1847	DUSP5	ENSG00000138166	FALSE	TRUE	FALSE
1848	DUSP6	ENSG00000139318	TRUE	TRUE	FALSE
1849	DUSP7	ENSG00000164086	FALSE	TRUE	TRUE
1850	DUSP8	ENSG00000184545	FALSE	TRUE	FALSE
1852	DUSP9	ENSG00000130829	FALSE	FALSE	FALSE
1854	DUT	ENSG00000128951	FALSE	TRUE	TRUE
1855	DVL1	ENSG00000107404	FALSE	TRUE	FALSE
1856	DVL2	ENSG00000004975	FALSE	TRUE	TRUE
1857	DVL3	ENSG00000161202	TRUE	TRUE	TRUE
1859	DYRK1A	ENSG00000157540	TRUE	TRUE	FALSE
1861	TOR1A	ENSG00000136827	FALSE	TRUE	TRUE
1869	E2F1	ENSG00000101412	TRUE	TRUE	FALSE
1870	E2F2	ENSG00000007968	TRUE	TRUE	FALSE
1871	E2F3	ENSG00000112242	FALSE	TRUE	FALSE
1874	E2F4	ENSG00000205250	FALSE	TRUE	FALSE
1875	E2F5	ENSG00000133740	FALSE	TRUE	TRUE
1876	E2F6	ENSG00000169016	FALSE	TRUE	FALSE
1877	E4F1	ENSG00000167967	FALSE	TRUE	FALSE
1879	EBF1	ENSG00000164330	TRUE	TRUE	TRUE
1880	GPR183	ENSG00000169508	FALSE	TRUE	FALSE
1889	ECE1	ENSG00000117298	TRUE	TRUE	TRUE
1890	TYMP	ENSG00000025708	FALSE	TRUE	FALSE
1891	ECH1	ENSG00000104823	FALSE	TRUE	TRUE
1892	ECHS1	ENSG00000127884	FALSE	TRUE	TRUE
1893	ECM1	ENSG00000143369	FALSE	TRUE	FALSE
1894	ECT2	ENSG00000114346	FALSE	TRUE	TRUE
1896	EDA	ENSG00000158813	TRUE	TRUE	FALSE
1901	S1PR1	ENSG00000170989	FALSE	TRUE	FALSE
1902	LPAR1	ENSG00000198121	FALSE	TRUE	FALSE
1903	S1PR3	ENSG00000213694	FALSE	TRUE	FALSE
1906	EDN1	ENSG00000078401	FALSE	TRUE	FALSE
1907	EDN2	ENSG00000127129	FALSE	TRUE	FALSE
1908	EDN3	ENSG00000124205	FALSE	TRUE	FALSE
1909	EDNRA	ENSG00000151617	TRUE	TRUE	FALSE
1910	EDNRB	ENSG00000136160	FALSE	TRUE	FALSE
1911	PHC1	ENSG00000111752	FALSE	TRUE	FALSE
1912	PHC2	ENSG00000134686	FALSE	TRUE	FALSE
1915	EEF1A1	ENSG00000156508	FALSE	TRUE	FALSE
1917	EEF1A2	ENSG00000101210	TRUE	TRUE	TRUE
1933	EEF1B2	ENSG00000114942	FALSE	TRUE	TRUE
1936	EEF1D	ENSG00000104529	FALSE	TRUE	TRUE
1937	EEF1G	ENSG00000254772	TRUE	TRUE	TRUE
1938	EEF2	ENSG00000167658	TRUE	TRUE	TRUE
1939	EIF2D	ENSG00000143486	FALSE	TRUE	TRUE
1942	EFNA1	ENSG00000169242	FALSE	TRUE	FALSE
1943	EFNA2	ENSG00000099617	FALSE	TRUE	FALSE
1944	EFNA3	ENSG00000143590	FALSE	TRUE	FALSE
1945	EFNA4	ENSG00000243364	FALSE	TRUE	FALSE
1946	EFNA5	ENSG00000184349	FALSE	TRUE	FALSE
1947	EFNB1	ENSG00000090776	FALSE	TRUE	FALSE
1948	EFNB2	ENSG00000125266	TRUE	TRUE	FALSE
1949	EFNB3	ENSG00000108947	FALSE	TRUE	FALSE
1950	EGF	ENSG00000138798	FALSE	TRUE	FALSE
1951	CELSR3	ENSG00000008300	TRUE	TRUE	FALSE
1952	CELSR2	ENSG00000143126	TRUE	TRUE	FALSE
1953	MEGF6	ENSG00000162591	FALSE	TRUE	TRUE
1954	MEGF8	ENSG00000105429	TRUE	TRUE	TRUE
1955	MEGF9	ENSG00000106780	TRUE	TRUE	FALSE
1956	EGFR	ENSG00000146648	TRUE	TRUE	FALSE
1958	EGR1	ENSG00000120738	FALSE	TRUE	FALSE
1959	EGR2	ENSG00000122877	FALSE	TRUE	FALSE
1960	EGR3	ENSG00000179388	FALSE	TRUE	FALSE
1961	EGR4	ENSG00000135625	FALSE	FALSE	FALSE
1962	EHHADH	ENSG00000113790	FALSE	TRUE	FALSE
1964	EIF1AX	ENSG00000173674	FALSE	TRUE	TRUE
1965	EIF2S1	ENSG00000134001	TRUE	TRUE	TRUE
1967	EIF2B1	ENSG00000111361	FALSE	TRUE	TRUE
1968	EIF2S3	ENSG00000130741	TRUE	TRUE	TRUE
1969	EPHA2	ENSG00000142627	FALSE	TRUE	FALSE
1973	EIF4A1	ENSG00000161960	TRUE	TRUE	TRUE
1974	EIF4A2	ENSG00000156976	TRUE	TRUE	TRUE
1975	EIF4B	ENSG00000063046	TRUE	TRUE	FALSE
1977	EIF4E	ENSG00000151247	TRUE	TRUE	TRUE
1978	EIF4EBP1	ENSG00000187840	FALSE	TRUE	FALSE
1979	EIF4EBP2	ENSG00000148730	FALSE	TRUE	FALSE
1981	EIF4G1	ENSG00000114867	FALSE	TRUE	FALSE
1982	EIF4G2	ENSG00000110321	FALSE	TRUE	FALSE
1983	EIF5	ENSG00000100664	TRUE	TRUE	TRUE
1984	EIF5A	ENSG00000132507	FALSE	TRUE	FALSE
1990	CELA1	ENSG00000139610	FALSE	FALSE	FALSE
1991	ELANE	ENSG00000197561	FALSE	TRUE	FALSE
1992	SERPINB1	ENSG00000021355	FALSE	TRUE	FALSE
1993	ELAVL2	ENSG00000107105	TRUE	FALSE	TRUE
1994	ELAVL1	ENSG00000066044	TRUE	TRUE	FALSE
1995	ELAVL3	ENSG00000196361	FALSE	FALSE	FALSE
1996	ELAVL4	ENSG00000162374	TRUE	FALSE	TRUE
1997	ELF1	ENSG00000120690	FALSE	TRUE	FALSE
1998	ELF2	ENSG00000109381	TRUE	TRUE	FALSE
1999	ELF3	ENSG00000163435	FALSE	TRUE	FALSE
2000	ELF4	ENSG00000102034	FALSE	TRUE	FALSE
2001	ELF5	ENSG00000135374	FALSE	FALSE	FALSE
2002	ELK1	ENSG00000126767	FALSE	TRUE	FALSE
2004	ELK3	ENSG00000111145	FALSE	TRUE	FALSE
2005	ELK4	ENSG00000158711	FALSE	TRUE	FALSE
2006	ELN	ENSG00000049540	FALSE	TRUE	FALSE
2009	EML1	ENSG00000066629	TRUE	TRUE	FALSE
2010	EMD	ENSG00000102119	FALSE	TRUE	FALSE
2011	MARK2	ENSG00000072518	TRUE	TRUE	FALSE
2012	EMP1	ENSG00000134531	FALSE	TRUE	FALSE
2013	EMP2	ENSG00000213853	FALSE	TRUE	FALSE
2014	EMP3	ENSG00000142227	FALSE	TRUE	FALSE
2015	ADGRE1	ENSG00000174837	FALSE	TRUE	FALSE
2016	EMX1	ENSG00000135638	FALSE	FALSE	FALSE
2017	CTTN	ENSG00000085733	FALSE	TRUE	TRUE
2018	EMX2	ENSG00000170370	TRUE	FALSE	FALSE
2019	EN1	ENSG00000163064	FALSE	FALSE	FALSE
2020	EN2	ENSG00000164778	FALSE	FALSE	FALSE
2021	ENDOG	ENSG00000167136	FALSE	TRUE	TRUE
2022	ENG	ENSG00000106991	TRUE	TRUE	FALSE
2023	ENO1	ENSG00000074800	FALSE	TRUE	TRUE
2026	ENO2	ENSG00000111674	FALSE	TRUE	TRUE
2027	ENO3	ENSG00000108515	FALSE	TRUE	FALSE
2028	ENPEP	ENSG00000138792	FALSE	TRUE	TRUE
2029	ENSA	ENSG00000143420	FALSE	TRUE	FALSE
2030	SLC29A1	ENSG00000112759	TRUE	TRUE	TRUE
2033	EP300	ENSG00000100393	TRUE	TRUE	FALSE
2034	EPAS1	ENSG00000116016	TRUE	TRUE	FALSE
2035	EPB41	ENSG00000159023	FALSE	TRUE	FALSE
2036	EPB41L1	ENSG00000088367	FALSE	TRUE	FALSE
2037	EPB41L2	ENSG00000079819	TRUE	TRUE	TRUE
2038	EPB42	ENSG00000166947	FALSE	FALSE	FALSE
2039	DMTN	ENSG00000158856	TRUE	TRUE	FALSE
2040	STOM	ENSG00000148175	FALSE	TRUE	TRUE
2041	EPHA1	ENSG00000146904	FALSE	TRUE	FALSE
2042	EPHA3	ENSG00000044524	FALSE	TRUE	FALSE
2043	EPHA4	ENSG00000116106	TRUE	TRUE	TRUE
2044	EPHA5	ENSG00000145242	FALSE	FALSE	FALSE
2045	EPHA7	ENSG00000135333	TRUE	TRUE	FALSE
2046	EPHA8	ENSG00000070886	FALSE	TRUE	FALSE
2047	EPHB1	ENSG00000154928	TRUE	TRUE	TRUE
2048	EPHB2	ENSG00000133216	TRUE	TRUE	FALSE
2049	EPHB3	ENSG00000182580	TRUE	TRUE	FALSE
2050	EPHB4	ENSG00000196411	TRUE	TRUE	FALSE
2051	EPHB6	ENSG00000106123	FALSE	TRUE	FALSE
2052	EPHX1	ENSG00000143819	FALSE	TRUE	TRUE
2053	EPHX2	ENSG00000120915	FALSE	TRUE	FALSE
2054	STX2	ENSG00000111450	FALSE	TRUE	FALSE
2055	CLN8	ENSG00000182372	FALSE	TRUE	FALSE
2056	EPO	ENSG00000130427	FALSE	TRUE	FALSE
2057	EPOR	ENSG00000187266	FALSE	TRUE	FALSE
2058	EPRS	ENSG00000136628	FALSE	TRUE	TRUE
2059	EPS8	ENSG00000151491	TRUE	TRUE	FALSE
2060	EPS15	ENSG00000085832	FALSE	TRUE	FALSE
2063	NR2F6	ENSG00000160113	FALSE	TRUE	FALSE
2064	ERBB2	ENSG00000141736	TRUE	TRUE	FALSE
2065	ERBB3	ENSG00000065361	TRUE	TRUE	FALSE
2066	ERBB4	ENSG00000178568	TRUE	TRUE	FALSE
2067	ERCC1	ENSG00000012061	FALSE	TRUE	TRUE
2068	ERCC2	ENSG00000104884	FALSE	TRUE	TRUE
2069	EREG	ENSG00000124882	FALSE	TRUE	FALSE
2070	EYA4	ENSG00000112319	FALSE	TRUE	FALSE
2071	ERCC3	ENSG00000163161	FALSE	TRUE	TRUE
2072	ERCC4	ENSG00000175595	FALSE	TRUE	TRUE
2073	ERCC5	ENSG00000134899	FALSE	TRUE	FALSE
2074	ERCC6	ENSG00000225830	FALSE	TRUE	FALSE
2077	ERF	ENSG00000105722	FALSE	TRUE	FALSE
2078	ERG	ENSG00000157554	TRUE	TRUE	FALSE
2079	ERH	ENSG00000100632	FALSE	TRUE	TRUE
2081	ERN1	ENSG00000178607	TRUE	TRUE	TRUE
2086	ERV3-1	ENSG00000213462	FALSE	TRUE	FALSE
2090	ESA4		FALSE	FALSE	FALSE
2091	FBL	ENSG00000105202	TRUE	TRUE	TRUE
2097	ESB3		FALSE	FALSE	FALSE
2098	ESD	ENSG00000139684	FALSE	TRUE	TRUE
2099	ESR1	ENSG00000091831	TRUE	TRUE	FALSE
2100	ESR2	ENSG00000140009	FALSE	TRUE	FALSE
2101	ESRRA	ENSG00000173153	FALSE	TRUE	FALSE
2103	ESRRB	ENSG00000119715	FALSE	TRUE	FALSE
2104	ESRRG	ENSG00000196482	TRUE	TRUE	TRUE
2107	ETF1	ENSG00000120705	TRUE	TRUE	TRUE
2108	ETFA	ENSG00000140374	FALSE	TRUE	TRUE
2109	ETFB	ENSG00000105379	FALSE	TRUE	TRUE
2110	ETFDH	ENSG00000171503	FALSE	TRUE	TRUE
2113	ETS1	ENSG00000134954	FALSE	TRUE	FALSE
2114	ETS2	ENSG00000157557	FALSE	TRUE	FALSE
2115	ETV1	ENSG00000006468	TRUE	TRUE	FALSE
2116	ETV2	ENSG00000105672	FALSE	FALSE	FALSE
2117	ETV3	ENSG00000117036	FALSE	TRUE	FALSE
2118	ETV4	ENSG00000175832	FALSE	TRUE	FALSE
2119	ETV5	ENSG00000244405	TRUE	TRUE	FALSE
2120	ETV6	ENSG00000139083	TRUE	TRUE	FALSE
2121	EVC	ENSG00000072840	FALSE	TRUE	FALSE
2122	MECOM	ENSG00000085276	TRUE	TRUE	FALSE
2123	EVI2A	ENSG00000126860	FALSE	TRUE	FALSE
2124	EVI2B	ENSG00000185862	FALSE	TRUE	FALSE
2125	EVPL	ENSG00000167880	FALSE	TRUE	FALSE
2128	EVX1	ENSG00000106038	FALSE	FALSE	FALSE
2130	EWSR1	ENSG00000182944	TRUE	TRUE	FALSE
2131	EXT1	ENSG00000182197	TRUE	TRUE	TRUE
2132	EXT2	ENSG00000151348	FALSE	TRUE	TRUE
2134	EXTL1	ENSG00000158008	FALSE	FALSE	FALSE
2135	EXTL2	ENSG00000162694	FALSE	TRUE	FALSE
2137	EXTL3	ENSG00000012232	FALSE	TRUE	TRUE
2138	EYA1	ENSG00000104313	TRUE	TRUE	TRUE
2139	EYA2	ENSG00000064655	FALSE	TRUE	FALSE
2140	EYA3	ENSG00000158161	TRUE	TRUE	FALSE
2145	EZH1	ENSG00000108799	FALSE	TRUE	FALSE
2146	EZH2	ENSG00000106462	TRUE	TRUE	TRUE
2147	F2	ENSG00000180210	TRUE	TRUE	FALSE
2149	F2R	ENSG00000181104	FALSE	TRUE	FALSE
2150	F2RL1	ENSG00000164251	FALSE	TRUE	FALSE
2151	F2RL2	ENSG00000164220	FALSE	TRUE	FALSE
2152	F3	ENSG00000117525	FALSE	TRUE	FALSE
2153	F5	ENSG00000198734	FALSE	TRUE	FALSE
2155	F7	ENSG00000057593	FALSE	TRUE	FALSE
2157	F8	ENSG00000185010	TRUE	TRUE	FALSE
2158	F9	ENSG00000101981	TRUE	TRUE	FALSE
2159	F10	ENSG00000126218	FALSE	TRUE	TRUE
2160	F11	ENSG00000088926	FALSE	TRUE	FALSE
2161	F12	ENSG00000131187	FALSE	TRUE	FALSE
2162	F13A1	ENSG00000124491	FALSE	TRUE	FALSE
2165	F13B	ENSG00000143278	FALSE	TRUE	FALSE
2166	FAAH	ENSG00000117480	FALSE	TRUE	TRUE
2167	FABP4	ENSG00000170323	FALSE	TRUE	TRUE
2168	FABP1	ENSG00000163586	FALSE	FALSE	FALSE
2169	FABP2	ENSG00000145384	FALSE	FALSE	FALSE
2170	FABP3	ENSG00000121769	FALSE	TRUE	FALSE
2171	FABP5	ENSG00000164687	FALSE	TRUE	FALSE
2172	FABP6	ENSG00000170231	FALSE	FALSE	FALSE
2173	FABP7	ENSG00000164434	FALSE	FALSE	TRUE
2175	FANCA	ENSG00000187741	FALSE	TRUE	FALSE
2176	FANCC	ENSG00000158169	FALSE	TRUE	FALSE
2177	FANCD2	ENSG00000144554	FALSE	TRUE	TRUE
2178	FANCE	ENSG00000112039	FALSE	TRUE	FALSE
2180	ACSL1	ENSG00000151726	FALSE	TRUE	FALSE
2181	ACSL3	ENSG00000123983	FALSE	TRUE	TRUE
2182	ACSL4	ENSG00000068366	TRUE	TRUE	TRUE
2184	FAH	ENSG00000103876	FALSE	TRUE	TRUE
2185	PTK2B	ENSG00000120899	TRUE	TRUE	FALSE
2186	BPTF	ENSG00000171634	TRUE	TRUE	FALSE
2187	FANCB	ENSG00000181544	TRUE	TRUE	FALSE
2188	FANCF	ENSG00000183161	FALSE	TRUE	FALSE
2189	FANCG	ENSG00000221829	FALSE	TRUE	FALSE
2191	FAP	ENSG00000078098	FALSE	TRUE	TRUE
2192	FBLN1	ENSG00000077942	FALSE	TRUE	TRUE
2193	FARSA	ENSG00000179115	FALSE	TRUE	TRUE
2194	FASN	ENSG00000169710	TRUE	TRUE	TRUE
2195	FAT1	ENSG00000083857	FALSE	TRUE	TRUE
2196	FAT2	ENSG00000086570	FALSE	TRUE	FALSE
2197	FAU	ENSG00000149806	FALSE	TRUE	TRUE
2199	FBLN2	ENSG00000163520	FALSE	TRUE	TRUE
2200	FBN1	ENSG00000166147	TRUE	TRUE	FALSE
2201	FBN2	ENSG00000138829	FALSE	TRUE	FALSE
2202	EFEMP1	ENSG00000115380	TRUE	TRUE	FALSE
2203	FBP1	ENSG00000165140	FALSE	TRUE	TRUE
2204	FCAR	ENSG00000186431	FALSE	TRUE	FALSE
2205	FCER1A	ENSG00000179639	FALSE	TRUE	FALSE
2206	MS4A2	ENSG00000149534	FALSE	TRUE	FALSE
2207	FCER1G	ENSG00000158869	FALSE	TRUE	FALSE
2208	FCER2	ENSG00000104921	FALSE	FALSE	FALSE
2209	FCGR1A	ENSG00000150337	TRUE	TRUE	FALSE
2210	FCGR1B	ENSG00000198019	FALSE	TRUE	FALSE
2212	FCGR2A	ENSG00000143226	TRUE	TRUE	FALSE
2213	FCGR2B	ENSG00000072694	FALSE	TRUE	FALSE
2214	FCGR3A	ENSG00000203747	FALSE	TRUE	FALSE
2215	FCGR3B	ENSG00000162747	FALSE	TRUE	FALSE
2217	FCGRT	ENSG00000104870	FALSE	TRUE	FALSE
2218	FKTN	ENSG00000106692	FALSE	TRUE	FALSE
2219	FCN1	ENSG00000085265	FALSE	TRUE	TRUE
2220	FCN2	ENSG00000160339	FALSE	TRUE	FALSE
2222	FDFT1	ENSG00000079459	FALSE	TRUE	TRUE
2224	FDPS	ENSG00000160752	FALSE	TRUE	TRUE
2230	FDX1	ENSG00000137714	FALSE	TRUE	TRUE
2232	FDXR	ENSG00000161513	FALSE	TRUE	TRUE
2235	FECH	ENSG00000066926	FALSE	TRUE	TRUE
2237	FEN1	ENSG00000168496	FALSE	TRUE	TRUE
2239	GPC4	ENSG00000076716	TRUE	TRUE	TRUE
2241	FER	ENSG00000151422	TRUE	TRUE	TRUE
2242	FES	ENSG00000182511	FALSE	TRUE	TRUE
2243	FGA	ENSG00000171560	FALSE	TRUE	FALSE
2244	FGB	ENSG00000171564	FALSE	TRUE	FALSE
2245	FGD1	ENSG00000102302	TRUE	TRUE	FALSE
2246	FGF1	ENSG00000113578	FALSE	TRUE	FALSE
2247	FGF2	ENSG00000138685	FALSE	TRUE	FALSE
2248	FGF3	ENSG00000186895	FALSE	TRUE	FALSE
2249	FGF4	ENSG00000075388	FALSE	TRUE	FALSE
2250	FGF5	ENSG00000138675	FALSE	TRUE	FALSE
2251	FGF6	ENSG00000111241	FALSE	FALSE	FALSE
2252	FGF7	ENSG00000140285	FALSE	TRUE	FALSE
2253	FGF8	ENSG00000107831	TRUE	TRUE	FALSE
2254	FGF9	ENSG00000102678	TRUE	TRUE	FALSE
2255	FGF10	ENSG00000070193	FALSE	TRUE	FALSE
2256	FGF11	ENSG00000161958	FALSE	TRUE	FALSE
2257	FGF12	ENSG00000114279	FALSE	TRUE	FALSE
2258	FGF13	ENSG00000129682	FALSE	TRUE	FALSE
2259	FGF14	ENSG00000102466	FALSE	FALSE	FALSE
2260	FGFR1	ENSG00000077782	TRUE	TRUE	FALSE
2261	FGFR3	ENSG00000068078	FALSE	TRUE	TRUE
2262	GPC5	ENSG00000179399	FALSE	TRUE	TRUE
2263	FGFR2	ENSG00000066468	TRUE	TRUE	TRUE
2264	FGFR4	ENSG00000160867	FALSE	TRUE	FALSE
2266	FGG	ENSG00000171557	FALSE	TRUE	FALSE
2267	FGL1	ENSG00000104760	FALSE	TRUE	FALSE
2268	FGR	ENSG00000000938	FALSE	TRUE	FALSE
2271	FH	ENSG00000091483	FALSE	TRUE	TRUE
2272	FHIT	ENSG00000189283	FALSE	TRUE	TRUE
2273	FHL1	ENSG00000022267	TRUE	TRUE	FALSE
2274	FHL2	ENSG00000115641	FALSE	TRUE	TRUE
2275	FHL3	ENSG00000183386	FALSE	TRUE	FALSE
2277	VEGFD	ENSG00000165197	FALSE	TRUE	FALSE
2280	FKBP1A	ENSG00000088832	FALSE	TRUE	FALSE
2281	FKBP1B	ENSG00000119782	FALSE	TRUE	FALSE
2286	FKBP2	ENSG00000173486	FALSE	TRUE	TRUE
2287	FKBP3	ENSG00000100442	FALSE	TRUE	FALSE
2288	FKBP4	ENSG00000004478	TRUE	TRUE	TRUE
2289	FKBP5	ENSG00000096060	FALSE	TRUE	FALSE
2290	FOXG1	ENSG00000176165	FALSE	TRUE	FALSE
2294	FOXF1	ENSG00000103241	TRUE	TRUE	FALSE
2295	FOXF2	ENSG00000137273	FALSE	FALSE	FALSE
2296	FOXC1	ENSG00000054598	FALSE	TRUE	FALSE
2297	FOXD1	ENSG00000251493	FALSE	TRUE	FALSE
2298	FOXD4	ENSG00000170122	FALSE	FALSE	FALSE
2299	FOXI1	ENSG00000168269	FALSE	FALSE	FALSE
2300	FOXL1	ENSG00000176678	FALSE	FALSE	FALSE
2301	FOXE3	ENSG00000186790	FALSE	FALSE	FALSE
2302	FOXJ1	ENSG00000129654	FALSE	FALSE	FALSE
2303	FOXC2	ENSG00000176692	FALSE	FALSE	FALSE
2304	FOXE1	ENSG00000178919	FALSE	FALSE	FALSE
2305	FOXM1	ENSG00000111206	FALSE	TRUE	FALSE
2306	FOXD2	ENSG00000186564	FALSE	FALSE	FALSE
2307	FOXS1	ENSG00000179772	FALSE	FALSE	FALSE
2308	FOXO1	ENSG00000150907	TRUE	TRUE	FALSE
2309	FOXO3	ENSG00000118689	FALSE	TRUE	FALSE
2312	FLG	ENSG00000143631	FALSE	TRUE	FALSE
2313	FLI1	ENSG00000151702	FALSE	TRUE	FALSE
2314	FLII	ENSG00000177731	FALSE	TRUE	TRUE
2315	MLANA	ENSG00000120215	FALSE	FALSE	FALSE
2316	FLNA	ENSG00000196924	TRUE	TRUE	TRUE
2317	FLNB	ENSG00000136068	FALSE	TRUE	FALSE
2318	FLNC	ENSG00000128591	TRUE	TRUE	FALSE
2319	FLOT2	ENSG00000132589	FALSE	TRUE	TRUE
2321	FLT1	ENSG00000102755	TRUE	TRUE	FALSE
2322	FLT3	ENSG00000122025	FALSE	TRUE	FALSE
2323	FLT3LG	ENSG00000090554	TRUE	TRUE	FALSE
2324	FLT4	ENSG00000037280	TRUE	TRUE	FALSE
2326	FMO1	ENSG00000010932	FALSE	TRUE	FALSE
2327	FMO2	ENSG00000094963	FALSE	TRUE	FALSE
2328	FMO3	ENSG00000007933	FALSE	TRUE	FALSE
2329	FMO4	ENSG00000076258	FALSE	TRUE	FALSE
2330	FMO5	ENSG00000131781	FALSE	TRUE	TRUE
2331	FMOD	ENSG00000122176	FALSE	TRUE	FALSE
2332	FMR1	ENSG00000102081	FALSE	TRUE	TRUE
2334	AFF2	ENSG00000155966	TRUE	FALSE	FALSE
2335	FN1	ENSG00000115414	FALSE	TRUE	FALSE
2339	FNTA	ENSG00000168522	TRUE	TRUE	TRUE
2342	FNTB	ENSG00000257365	FALSE	TRUE	TRUE
2346	FOLH1	ENSG00000086205	FALSE	TRUE	FALSE
2348	FOLR1	ENSG00000110195	FALSE	TRUE	FALSE
2350	FOLR2	ENSG00000165457	FALSE	TRUE	FALSE
2352	FOLR3	ENSG00000110203	FALSE	TRUE	FALSE
2353	FOS	ENSG00000170345	FALSE	TRUE	FALSE
2354	FOSB	ENSG00000125740	FALSE	TRUE	FALSE
2355	FOSL2	ENSG00000075426	TRUE	TRUE	FALSE
2356	FPGS	ENSG00000136877	FALSE	TRUE	TRUE
2357	FPR1	ENSG00000171051	FALSE	TRUE	FALSE
2358	FPR2	ENSG00000171049	FALSE	FALSE	FALSE
2359	FPR3	ENSG00000187474	FALSE	TRUE	FALSE
2395	FXN	ENSG00000165060	FALSE	TRUE	FALSE
2444	FRK	ENSG00000111816	FALSE	TRUE	TRUE
2475	MTOR	ENSG00000198793	TRUE	TRUE	TRUE
2483	FRG1	ENSG00000109536	FALSE	TRUE	TRUE
2487	FRZB	ENSG00000162998	FALSE	TRUE	FALSE
2488	FSHB	ENSG00000131808	FALSE	TRUE	FALSE
2491	CENPI	ENSG00000102384	TRUE	TRUE	FALSE
2492	FSHR	ENSG00000170820	FALSE	TRUE	FALSE
2494	NR5A2	ENSG00000116833	TRUE	TRUE	FALSE
2495	FTH1	ENSG00000167996	TRUE	TRUE	FALSE
2512	FTL	ENSG00000087086	FALSE	TRUE	FALSE
2515	ADAM2	ENSG00000104755	FALSE	TRUE	FALSE
2516	NR5A1	ENSG00000136931	TRUE	TRUE	FALSE
2517	FUCA1	ENSG00000179163	FALSE	TRUE	FALSE
2519	FUCA2	ENSG00000001036	FALSE	TRUE	TRUE
2520	GAST	ENSG00000184502	FALSE	TRUE	FALSE
2521	FUS	ENSG00000089280	TRUE	TRUE	FALSE
2523	FUT1	ENSG00000174951	FALSE	TRUE	FALSE
2524	FUT2	ENSG00000176920	FALSE	FALSE	FALSE
2525	FUT3	ENSG00000171124	FALSE	FALSE	TRUE
2526	FUT4	ENSG00000196371	FALSE	TRUE	FALSE
2527	FUT5	ENSG00000130383	FALSE	FALSE	TRUE
2528	FUT6	ENSG00000156413	FALSE	FALSE	TRUE
2529	FUT7	ENSG00000180549	TRUE	FALSE	FALSE
2530	FUT8	ENSG00000033170	TRUE	TRUE	TRUE
2531	KDSR	ENSG00000119537	FALSE	TRUE	TRUE
2532	ACKR1	ENSG00000213088	FALSE	TRUE	FALSE
2533	FYB	ENSG00000082074	FALSE	TRUE	FALSE
2534	FYN	ENSG00000010810	TRUE	TRUE	TRUE
2535	FZD2	ENSG00000180340	FALSE	TRUE	FALSE
2537	IFI6	ENSG00000126709	FALSE	TRUE	FALSE
2538	G6PC	ENSG00000131482	FALSE	FALSE	FALSE
2539	G6PD	ENSG00000160211	TRUE	TRUE	TRUE
2541	G6PR		FALSE	FALSE	FALSE
2542	SLC37A4	ENSG00000137700	FALSE	TRUE	FALSE
2543	GAGE1	ENSG00000205777	FALSE	FALSE	FALSE
2547	XRCC6	ENSG00000196419	FALSE	TRUE	TRUE
2548	GAA	ENSG00000171298	FALSE	TRUE	TRUE
2549	GAB1	ENSG00000109458	FALSE	TRUE	FALSE
2550	GABBR1	ENSG00000204681	TRUE	TRUE	TRUE
2551	GABPA	ENSG00000154727	TRUE	TRUE	TRUE
2553	GABPB1	ENSG00000104064	TRUE	TRUE	FALSE
2554	GABRA1	ENSG00000022355	TRUE	TRUE	FALSE
2555	GABRA2	ENSG00000151834	FALSE	TRUE	FALSE
2556	GABRA3	ENSG00000011677	FALSE	TRUE	TRUE
2557	GABRA4	ENSG00000109158	TRUE	TRUE	FALSE
2558	GABRA5	ENSG00000186297	TRUE	TRUE	FALSE
2559	GABRA6	ENSG00000145863	FALSE	TRUE	TRUE
2560	GABRB1	ENSG00000163288	TRUE	TRUE	FALSE
2561	GABRB2	ENSG00000145864	TRUE	TRUE	FALSE
2562	GABRB3	ENSG00000166206	TRUE	TRUE	TRUE
2563	GABRD	ENSG00000187730	TRUE	TRUE	FALSE
2564	GABRE	ENSG00000102287	FALSE	TRUE	FALSE
2565	GABRG1	ENSG00000163285	FALSE	TRUE	FALSE
2566	GABRG2	ENSG00000113327	TRUE	TRUE	FALSE
2567	GABRG3	ENSG00000182256	TRUE	TRUE	FALSE
2568	GABRP	ENSG00000094755	FALSE	TRUE	FALSE
2569	GABRR1	ENSG00000146276	FALSE	TRUE	FALSE
2570	GABRR2	ENSG00000111886	FALSE	TRUE	FALSE
2571	GAD1	ENSG00000128683	FALSE	TRUE	TRUE
2572	GAD2	ENSG00000136750	FALSE	TRUE	FALSE
2574	GAGE2C		FALSE	FALSE	FALSE
2575	GAGE3		FALSE	FALSE	FALSE
2576	GAGE4		FALSE	FALSE	FALSE
2577	GAGE5		FALSE	FALSE	FALSE
2578	GAGE6		FALSE	FALSE	FALSE
2579	GAGE7		FALSE	FALSE	FALSE
2580	GAK	ENSG00000178950	TRUE	TRUE	TRUE
2581	GALC	ENSG00000054983	FALSE	TRUE	TRUE
2582	GALE	ENSG00000117308	FALSE	TRUE	TRUE
2583	B4GALNT1	ENSG00000135454	FALSE	TRUE	FALSE
2584	GALK1	ENSG00000108479	FALSE	TRUE	FALSE
2585	GALK2	ENSG00000156958	FALSE	TRUE	TRUE
2587	GALR1	ENSG00000166573	FALSE	FALSE	TRUE
2588	GALNS	ENSG00000141012	FALSE	TRUE	FALSE
2589	GALNT1	ENSG00000141429	FALSE	TRUE	TRUE
2590	GALNT2	ENSG00000143641	TRUE	TRUE	TRUE
2591	GALNT3	ENSG00000115339	FALSE	TRUE	FALSE
2592	GALT	ENSG00000213930	FALSE	TRUE	TRUE
2593	GAMT	ENSG00000130005	FALSE	TRUE	FALSE
2595	GANC	ENSG00000214013	FALSE	TRUE	FALSE
2596	GAP43	ENSG00000172020	FALSE	FALSE	FALSE
2597	GAPDH	ENSG00000111640	FALSE	TRUE	TRUE
2615	LRRC32	ENSG00000137507	FALSE	TRUE	FALSE
2617	GARS	ENSG00000106105	FALSE	TRUE	TRUE
2618	GART	ENSG00000159131	FALSE	TRUE	TRUE
2619	GAS1	ENSG00000180447	FALSE	TRUE	FALSE
2620	GAS2	ENSG00000148935	FALSE	TRUE	FALSE
2621	GAS6	ENSG00000183087	FALSE	TRUE	FALSE
2622	GAS8	ENSG00000141013	FALSE	TRUE	TRUE
2623	GATA1	ENSG00000102145	FALSE	TRUE	FALSE
2624	GATA2	ENSG00000179348	TRUE	TRUE	FALSE
2625	GATA3	ENSG00000107485	FALSE	TRUE	FALSE
2626	GATA4	ENSG00000136574	FALSE	TRUE	FALSE
2627	GATA6	ENSG00000141448	FALSE	TRUE	FALSE
2628	GATM	ENSG00000171766	FALSE	TRUE	FALSE
2629	GBA	ENSG00000177628	FALSE	TRUE	TRUE
2631	GBAS	ENSG00000146729	FALSE	TRUE	TRUE
2632	GBE1	ENSG00000114480	FALSE	TRUE	TRUE
2633	GBP1	ENSG00000117228	FALSE	TRUE	FALSE
2634	GBP2	ENSG00000162645	FALSE	TRUE	FALSE
2635	GBP3	ENSG00000117226	FALSE	TRUE	FALSE
2636	GBX1	ENSG00000164900	FALSE	FALSE	FALSE
2637	GBX2	ENSG00000168505	FALSE	FALSE	FALSE
2638	GC	ENSG00000145321	FALSE	TRUE	FALSE
2639	GCDH	ENSG00000105607	FALSE	TRUE	TRUE
2641	GCG	ENSG00000115263	FALSE	TRUE	FALSE
2642	GCGR	ENSG00000215644	FALSE	TRUE	FALSE
2643	GCH1	ENSG00000131979	FALSE	TRUE	TRUE
2644	GCHFR	ENSG00000137880	FALSE	TRUE	TRUE
2645	GCK	ENSG00000106633	FALSE	TRUE	FALSE
2646	GCKR	ENSG00000084734	TRUE	TRUE	FALSE
2647	BLOC1S1	ENSG00000135441	FALSE	TRUE	TRUE
2648	KAT2A	ENSG00000108773	FALSE	TRUE	TRUE
2649	NR6A1	ENSG00000148200	TRUE	TRUE	FALSE
2650	GCNT1	ENSG00000187210	FALSE	TRUE	FALSE
2651	GCNT2	ENSG00000111846	FALSE	TRUE	FALSE
2652	OPN1MW	ENSG00000268221	FALSE	FALSE	FALSE
2653	GCSH	ENSG00000140905	FALSE	TRUE	TRUE
2657	GDF1	ENSG00000130283	FALSE	TRUE	FALSE
2658	GDF2	ENSG00000263761	FALSE	TRUE	FALSE
2660	MSTN	ENSG00000138379	FALSE	TRUE	TRUE
2661	GDF9	ENSG00000164404	FALSE	TRUE	FALSE
2662	GDF10	ENSG00000266524	FALSE	TRUE	FALSE
2664	GDI1	ENSG00000203879	TRUE	TRUE	TRUE
2665	GDI2	ENSG00000057608	TRUE	TRUE	FALSE
2668	GDNF	ENSG00000168621	FALSE	TRUE	FALSE
2669	GEM	ENSG00000164949	FALSE	TRUE	FALSE
2670	GFAP	ENSG00000131095	FALSE	TRUE	FALSE
2671	GFER	ENSG00000127554	FALSE	TRUE	TRUE
2672	GFI1	ENSG00000162676	FALSE	TRUE	FALSE
2673	GFPT1	ENSG00000198380	TRUE	TRUE	FALSE
2674	GFRA1	ENSG00000151892	FALSE	TRUE	FALSE
2675	GFRA2	ENSG00000168546	FALSE	TRUE	FALSE
2676	GFRA3	ENSG00000146013	FALSE	TRUE	FALSE
2677	GGCX	ENSG00000115486	FALSE	TRUE	TRUE
2678	GGT1	ENSG00000100031	FALSE	TRUE	TRUE
2683	B4GALT1	ENSG00000086062	FALSE	TRUE	FALSE
2686	GGT7	ENSG00000131067	TRUE	TRUE	FALSE
2687	GGT5	ENSG00000099998	FALSE	TRUE	FALSE
2688	GH1	ENSG00000259384	FALSE	TRUE	FALSE
2689	GH2	ENSG00000136487	FALSE	TRUE	FALSE
2690	GHR	ENSG00000112964	FALSE	TRUE	FALSE
2691	GHRH	ENSG00000118702	FALSE	TRUE	FALSE
2692	GHRHR	ENSG00000106128	FALSE	TRUE	FALSE
2693	GHSR	ENSG00000121853	FALSE	FALSE	TRUE
2694	GIF	ENSG00000134812	FALSE	TRUE	FALSE
2695	GIP	ENSG00000159224	FALSE	TRUE	FALSE
2696	GIPR	ENSG00000010310	FALSE	TRUE	FALSE
2697	GJA1	ENSG00000152661	FALSE	TRUE	FALSE
2700	GJA3	ENSG00000121743	FALSE	TRUE	FALSE
2701	GJA4	ENSG00000187513	FALSE	TRUE	FALSE
2702	GJA5	ENSG00000265107	FALSE	FALSE	FALSE
2703	GJA8	ENSG00000121634	FALSE	TRUE	FALSE
2705	GJB1	ENSG00000169562	FALSE	TRUE	FALSE
2706	GJB2	ENSG00000165474	FALSE	TRUE	FALSE
2707	GJB3	ENSG00000188910	FALSE	FALSE	FALSE
2709	GJB5	ENSG00000189280	FALSE	TRUE	FALSE
2710	GK	ENSG00000198814	TRUE	TRUE	TRUE
2712	GK2	ENSG00000196475	FALSE	FALSE	FALSE
2717	GLA	ENSG00000102393	TRUE	TRUE	TRUE
2719	GPC3	ENSG00000147257	TRUE	TRUE	FALSE
2720	GLB1	ENSG00000170266	FALSE	TRUE	TRUE
2729	GCLC	ENSG00000001084	FALSE	TRUE	TRUE
2730	GCLM	ENSG00000023909	FALSE	TRUE	TRUE
2731	GLDC	ENSG00000178445	FALSE	TRUE	TRUE
2733	GLE1	ENSG00000119392	FALSE	TRUE	FALSE
2734	GLG1	ENSG00000090863	TRUE	TRUE	TRUE
2735	GLI1	ENSG00000111087	FALSE	TRUE	FALSE
2736	GLI2	ENSG00000074047	FALSE	TRUE	FALSE
2737	GLI3	ENSG00000106571	TRUE	TRUE	FALSE
2738	GLI4	ENSG00000250571	FALSE	TRUE	FALSE
2739	GLO1	ENSG00000124767	FALSE	TRUE	TRUE
2740	GLP1R	ENSG00000112164	FALSE	TRUE	FALSE
2741	GLRA1	ENSG00000145888	FALSE	TRUE	TRUE
2742	GLRA2	ENSG00000101958	TRUE	TRUE	FALSE
2743	GLRB	ENSG00000109738	FALSE	TRUE	TRUE
2744	GLS	ENSG00000115419	TRUE	TRUE	TRUE
2745	GLRX	ENSG00000173221	FALSE	TRUE	TRUE
2746	GLUD1	ENSG00000148672	FALSE	TRUE	TRUE
2747	GLUD2	ENSG00000182890	FALSE	TRUE	FALSE
2752	GLUL	ENSG00000135821	TRUE	TRUE	TRUE
2760	GM2A	ENSG00000196743	FALSE	TRUE	FALSE
2762	GMDS	ENSG00000112699	TRUE	TRUE	TRUE
2764	GMFB	ENSG00000197045	FALSE	TRUE	TRUE
2765	GML	ENSG00000104499	FALSE	TRUE	FALSE
2766	GMPR	ENSG00000137198	FALSE	TRUE	FALSE
2767	GNA11	ENSG00000088256	TRUE	TRUE	TRUE
2768	GNA12	ENSG00000146535	TRUE	TRUE	TRUE
2769	GNA15	ENSG00000060558	FALSE	TRUE	FALSE
2770	GNAI1	ENSG00000127955	TRUE	TRUE	TRUE
2771	GNAI2	ENSG00000114353	FALSE	TRUE	TRUE
2773	GNAI3	ENSG00000065135	FALSE	TRUE	FALSE
2774	GNAL	ENSG00000141404	TRUE	TRUE	FALSE
2775	GNAO1	ENSG00000087258	TRUE	TRUE	TRUE
2776	GNAQ	ENSG00000156052	TRUE	TRUE	FALSE
2778	GNAS	ENSG00000087460	TRUE	TRUE	TRUE
2779	GNAT1	ENSG00000114349	FALSE	FALSE	FALSE
2780	GNAT2	ENSG00000134183	FALSE	FALSE	FALSE
2781	GNAZ	ENSG00000128266	FALSE	TRUE	FALSE
2782	GNB1	ENSG00000078369	TRUE	TRUE	TRUE
2783	GNB2	ENSG00000172354	TRUE	TRUE	FALSE
2784	GNB3	ENSG00000111664	FALSE	TRUE	FALSE
2785	GNG3	ENSG00000162188	FALSE	TRUE	FALSE
2786	GNG4	ENSG00000168243	FALSE	TRUE	FALSE
2787	GNG5	ENSG00000174021	FALSE	TRUE	FALSE
2788	GNG7	ENSG00000176533	FALSE	TRUE	FALSE
2790	GNG10	ENSG00000242616	FALSE	TRUE	FALSE
2791	GNG11	ENSG00000127920	FALSE	TRUE	FALSE
2792	GNGT1	ENSG00000127928	FALSE	FALSE	FALSE
2793	GNGT2	ENSG00000167083	FALSE	TRUE	FALSE
2794	GNL1	ENSG00000204590	TRUE	TRUE	TRUE
2796	GNRH1	ENSG00000147437	FALSE	TRUE	FALSE
2797	GNRH2	ENSG00000125787	FALSE	TRUE	FALSE
2798	GNRHR	ENSG00000109163	FALSE	FALSE	FALSE
2799	GNS	ENSG00000135677	FALSE	TRUE	TRUE
2800	GOLGA1	ENSG00000136935	FALSE	TRUE	FALSE
2801	GOLGA2	ENSG00000167110	TRUE	TRUE	FALSE
2802	GOLGA3	ENSG00000090615	TRUE	TRUE	FALSE
2803	GOLGA4	ENSG00000144674	FALSE	TRUE	FALSE
2804	GOLGB1	ENSG00000173230	FALSE	TRUE	FALSE
2805	GOT1	ENSG00000120053	FALSE	TRUE	TRUE
2806	GOT2	ENSG00000125166	FALSE	TRUE	TRUE
2810	SFN	ENSG00000175793	FALSE	TRUE	FALSE
2811	GP1BA	ENSG00000185245	FALSE	TRUE	FALSE
2812	GP1BB	ENSG00000203618	FALSE	TRUE	FALSE
2813	GP2	ENSG00000169347	FALSE	TRUE	FALSE
2814	GP5	ENSG00000178732	FALSE	TRUE	FALSE
2815	GP9	ENSG00000169704	FALSE	TRUE	FALSE
2817	GPC1	ENSG00000063660	FALSE	TRUE	FALSE
2819	GPD1	ENSG00000167588	FALSE	TRUE	TRUE
2820	GPD2	ENSG00000115159	FALSE	TRUE	TRUE
2821	GPI	ENSG00000105220	FALSE	TRUE	TRUE
2822	GPLD1	ENSG00000112293	FALSE	TRUE	FALSE
2823	GPM6A	ENSG00000150625	TRUE	TRUE	TRUE
2824	GPM6B	ENSG00000046653	FALSE	TRUE	FALSE
2825	GPR1	ENSG00000183671	FALSE	FALSE	FALSE
2826	CCR10	ENSG00000184451	FALSE	FALSE	FALSE
2827	GPR3	ENSG00000181773	FALSE	TRUE	FALSE
2828	GPR4	ENSG00000177464	FALSE	TRUE	FALSE
2829	XCR1	ENSG00000173578	FALSE	FALSE	FALSE
2830	GPR6	ENSG00000146360	FALSE	FALSE	FALSE
2831	NPBWR1	ENSG00000183729	FALSE	FALSE	FALSE
2832	NPBWR2	ENSG00000125522	FALSE	FALSE	FALSE
2833	CXCR3	ENSG00000186810	FALSE	FALSE	FALSE
2834	PRLHR	ENSG00000119973	FALSE	FALSE	TRUE
2835	GPR12	ENSG00000132975	FALSE	TRUE	FALSE
2837	UTS2R	ENSG00000181408	FALSE	FALSE	FALSE
2838	GPR15	ENSG00000154165	FALSE	FALSE	FALSE
2840	GPR17	ENSG00000144230	FALSE	FALSE	FALSE
2841	GPR18	ENSG00000125245	FALSE	FALSE	FALSE
2842	GPR19	ENSG00000183150	FALSE	TRUE	FALSE
2843	GPR20	ENSG00000204882	FALSE	FALSE	FALSE
2844	GPR21	ENSG00000011454	FALSE	FALSE	FALSE
2845	GPR22	ENSG00000172209	FALSE	FALSE	FALSE
2846	LPAR4	ENSG00000147145	FALSE	FALSE	FALSE
2847	MCHR1	ENSG00000128285	FALSE	FALSE	FALSE
2848	GPR25	ENSG00000170128	FALSE	FALSE	FALSE
2849	GPR26	ENSG00000154478	FALSE	TRUE	FALSE
2850	GPR27	ENSG00000170837	FALSE	TRUE	FALSE
2852	GPER1	ENSG00000164850	FALSE	TRUE	FALSE
2853	GPR31	ENSG00000120436	FALSE	FALSE	FALSE
2854	GPR32	ENSG00000142511	FALSE	FALSE	FALSE
2856	GPR33	ENSG00000214943	FALSE	FALSE	FALSE
2857	GPR34	ENSG00000171659	FALSE	TRUE	FALSE
2859	GPR35	ENSG00000178623	FALSE	TRUE	FALSE
2861	GPR37	ENSG00000170775	FALSE	TRUE	FALSE
2862	MLNR	ENSG00000102539	FALSE	FALSE	FALSE
2863	GPR39	ENSG00000183840	FALSE	TRUE	FALSE
2864	FFAR1	ENSG00000126266	FALSE	FALSE	FALSE
2865	FFAR3	ENSG00000185897	FALSE	FALSE	FALSE
2866	GPR42		FALSE	FALSE	FALSE
2867	FFAR2	ENSG00000126262	FALSE	FALSE	FALSE
2868	GRK4	ENSG00000125388	FALSE	TRUE	FALSE
2869	GRK5	ENSG00000198873	TRUE	TRUE	TRUE
2870	GRK6	ENSG00000198055	FALSE	TRUE	FALSE
2872	MKNK2	ENSG00000099875	FALSE	TRUE	TRUE
2873	GPS1	ENSG00000169727	TRUE	TRUE	TRUE
2874	GPS2	ENSG00000132522	FALSE	TRUE	FALSE
2875	GPT	ENSG00000167701	FALSE	TRUE	TRUE
2876	GPX1	ENSG00000233276	FALSE	TRUE	FALSE
2877	GPX2	ENSG00000176153	FALSE	TRUE	FALSE
2878	GPX3	ENSG00000211445	FALSE	TRUE	FALSE
2879	GPX4	ENSG00000167468	FALSE	TRUE	TRUE
2880	GPX5	ENSG00000224586	FALSE	TRUE	TRUE
2882	GPX7	ENSG00000116157	FALSE	TRUE	TRUE
2885	GRB2	ENSG00000177885	FALSE	TRUE	TRUE
2886	GRB7	ENSG00000141738	FALSE	TRUE	FALSE
2887	GRB10	ENSG00000106070	FALSE	TRUE	FALSE
2888	GRB14	ENSG00000115290	FALSE	TRUE	FALSE
2889	RAPGEF1	ENSG00000107263	TRUE	TRUE	FALSE
2890	GRIA1	ENSG00000155511	TRUE	TRUE	FALSE
2891	GRIA2	ENSG00000120251	TRUE	TRUE	FALSE
2892	GRIA3	ENSG00000125675	FALSE	TRUE	TRUE
2893	GRIA4	ENSG00000152578	TRUE	TRUE	FALSE
2894	GRID1	ENSG00000182771	TRUE	TRUE	FALSE
2895	GRID2	ENSG00000152208	TRUE	TRUE	FALSE
2896	GRN	ENSG00000030582	FALSE	TRUE	FALSE
2897	GRIK1	ENSG00000171189	FALSE	FALSE	TRUE
2898	GRIK2	ENSG00000164418	TRUE	TRUE	TRUE
2899	GRIK3	ENSG00000163873	TRUE	TRUE	FALSE
2900	GRIK4	ENSG00000149403	FALSE	TRUE	FALSE
2901	GRIK5	ENSG00000105737	TRUE	TRUE	FALSE
2902	GRIN1	ENSG00000176884	TRUE	TRUE	TRUE
2903	GRIN2A	ENSG00000183454	TRUE	TRUE	FALSE
2904	GRIN2B	ENSG00000273079	TRUE	TRUE	FALSE
2905	GRIN2C	ENSG00000161509	FALSE	TRUE	FALSE
2906	GRIN2D	ENSG00000105464	TRUE	TRUE	TRUE
2907	GRINA	ENSG00000178719	FALSE	TRUE	TRUE
2908	NR3C1	ENSG00000113580	FALSE	TRUE	FALSE
2909	ARHGAP35	ENSG00000160007	TRUE	TRUE	TRUE
2911	GRM1	ENSG00000152822	TRUE	TRUE	FALSE
2912	GRM2	ENSG00000164082	TRUE	TRUE	FALSE
2913	GRM3	ENSG00000198822	TRUE	TRUE	TRUE
2914	GRM4	ENSG00000124493	TRUE	TRUE	FALSE
2915	GRM5	ENSG00000168959	FALSE	TRUE	FALSE
2916	GRM6	ENSG00000113262	FALSE	TRUE	FALSE
2917	GRM7	ENSG00000196277	TRUE	TRUE	TRUE
2918	GRM8	ENSG00000179603	FALSE	FALSE	TRUE
2919	CXCL1	ENSG00000163739	FALSE	TRUE	FALSE
2920	CXCL2	ENSG00000081041	FALSE	TRUE	FALSE
2921	CXCL3	ENSG00000163734	FALSE	TRUE	FALSE
2922	GRP	ENSG00000134443	FALSE	TRUE	FALSE
2923	PDIA3	ENSG00000167004	TRUE	TRUE	TRUE
2925	GRPR	ENSG00000126010	FALSE	FALSE	FALSE
2926	GRSF1	ENSG00000132463	FALSE	TRUE	FALSE
2928	GSC2	ENSG00000063515	FALSE	FALSE	FALSE
2931	GSK3A	ENSG00000105723	TRUE	TRUE	TRUE
2932	GSK3B	ENSG00000082701	TRUE	TRUE	TRUE
2934	GSN	ENSG00000148180	FALSE	TRUE	FALSE
2935	GSPT1	ENSG00000103342	TRUE	TRUE	TRUE
2936	GSR	ENSG00000104687	FALSE	TRUE	TRUE
2937	GSS	ENSG00000100983	FALSE	TRUE	TRUE
2938	GSTA1	ENSG00000243955	FALSE	TRUE	FALSE
2939	GSTA2	ENSG00000244067	FALSE	FALSE	FALSE
2940	GSTA3	ENSG00000174156	FALSE	FALSE	FALSE
2941	GSTA4	ENSG00000170899	FALSE	TRUE	FALSE
2944	GSTM1	ENSG00000134184	FALSE	TRUE	FALSE
2946	GSTM2	ENSG00000213366	FALSE	TRUE	FALSE
2947	GSTM3	ENSG00000134202	FALSE	TRUE	FALSE
2948	GSTM4	ENSG00000168765	FALSE	TRUE	FALSE
2949	GSTM5	ENSG00000134201	FALSE	TRUE	FALSE
2950	GSTP1	ENSG00000084207	FALSE	TRUE	FALSE
2952	GSTT1		FALSE	FALSE	FALSE
2953	GSTT2	ENSG00000099984	FALSE	TRUE	FALSE
2954	GSTZ1	ENSG00000100577	FALSE	TRUE	TRUE
2956	MSH6	ENSG00000116062	FALSE	TRUE	TRUE
[truncated: 17,230 more rows]
